# Supplementary material
Source: HighWire-hosted journal article supplement (https://dmd.aspetjournals.org/highwire/filestream/80014/field_highwire_adjunct_files/0/1129_supp_data.pdf)
Supplement: 1129_supp_data.pdf [file 1129_supp_data.pdf]

## Electronic supplementary material to

### Predictive Performance of Physiologically Based Pharmacokinetic Modelling of Beta-Lactam Antibiotic Concentrations in Adipose, Bone and Muscle Tissues

Pieter-Jan De Sutter<sup>1</sup>, Pieter De Cock<sup>2,3,4</sup>, Trevor N Johnson<sup>5</sup>, Helen Musther<sup>5</sup>, Elke Gasthuys<sup>1</sup>, An Vermeulen<sup>1</sup>

1: Department of Bioanalysis, Laboratory of Medical Biochemistry and Clinical Analysis, Faculty of Pharmaceutical Sciences, Ghent University, Ghent, Belgium

2: Department of Pharmacy, Ghent University Hospital

3: Department of Basic and Applied Medical Sciences, Ghent University

4: Department of Pediatric Intensive Care, Ghent University Hospital

5: Certara UK Limited

#### Contents

|                                                                                             |    |
|---------------------------------------------------------------------------------------------|----|
| Extended methodology .....                                                                  | 2  |
| Calculating unbound interstitial fluid concentration from total tissue concentrations ..... | 2  |
| Extended results.....                                                                       | 3  |
| Supplementary Figures S1-9.....                                                             | 3  |
| Supplementary Tables S1-8.....                                                              | 12 |
| Supplementary references.....                                                               | 23 |

## Extended methodology

### Calculating unbound interstitial fluid concentration from total tissue concentrations

At distribution equilibrium (steady-state between blood and tissue concentration), the total tissue to plasma partition coefficient ( $Kp_{total}$ ) can be defined as the ratio of the total tissue concentration ( $C_{total\ tissue,SS}$ ) to the (total) plasma concentration ( $C_{plasma,SS}$ ):

$$Kp_{total} = \frac{C_{total\ tissue,SS}}{C_{plasma,SS}} \quad \text{Eq. S1}$$

Similarly, an unbound interstitial fluid to plasma partition coefficient ( $Kp_{ISF,u}$ ) can be defined based on the unbound interstitial fluid concentration ( $C_{ISF,u,SS}$ ) and total plasma concentrations at distribution equilibrium:

$$Kp_{ISF,u} = \frac{C_{ISF,u,SS}}{C_{plasma,SS}} \quad \text{Eq. S2}$$

Based on the free drug hypothesis, an equilibrium between the unbound plasma concentration ( $C_{plasma,u,SS}$ ) and the unbound interstitial fluid concentration can be assumed, giving:

$$C_{plasma,u,SS} = C_{ISF,u,SS} \quad \text{Eq. S3}$$

Substituting Eq. S3 in Eq. S2 gives:

$$Kp_{ISF,u} = \frac{C_{plasma,u,SS}}{C_{plasma,SS}} = fu_{plasma} \quad \text{Eq. S4}$$

where  $fu_{plasma}$  is the free fraction in plasma. Using Eq. S1, Eq. S2 and Eq. S4, the unbound interstitial fluid concentration at distribution equilibrium can be expressed in terms of the total tissue concentration at distribution equilibrium as follows:

Re-arranging Eq. S1 and Eq. S2 in terms of  $C_{plasma,SS}$  gives:

$$C_{plasma,SS} = \frac{C_{total\ tissue,SS}}{Kp_{total}} = \frac{C_{ISF,u,SS}}{Kp_{ISF,u}} \quad \text{Eq. S5}$$

Re-arranging Eq. S5 in terms of  $C_{ISF,u,SS}$  and substituting  $Kp_{ISF,u}$  for  $fu_{plasma}$  (Eq. S4) gives:

$$C_{ISF,u,SS} = \frac{Kp_{ISF,u}}{Kp_{total}} C_{total\ tissue,SS} = \frac{fu_{plasma}}{Kp_{total}} C_{total\ tissue,SS} \quad \text{Eq. S6}$$

When an instant equilibrium between interstitial and intracellular tissue compartments is assumed, the relative differences between total tissue and unbound interstitial fluid concentrations are constant as a function of time. Eq. S6 can be generalized to non-steady-state timepoints as:

$$\frac{dC_{ISF,u}}{dt} = \frac{fu_{plasma}}{Kp_{total}} \frac{dC_{total\ tissue}}{dt} \quad \text{Eq. S7}$$

Using Eq. S7 (Eq. 2 in main manuscript), PBPK total tissue profiles of perfusion limited tissues can be converted to unbound interstitial fluid concentration profiles by multiplying them with a factor equal to the ratio of  $fu_{plasma}$  to  $Kp_{total}$ .

## Extended results

### Supplementary Figures S1-9

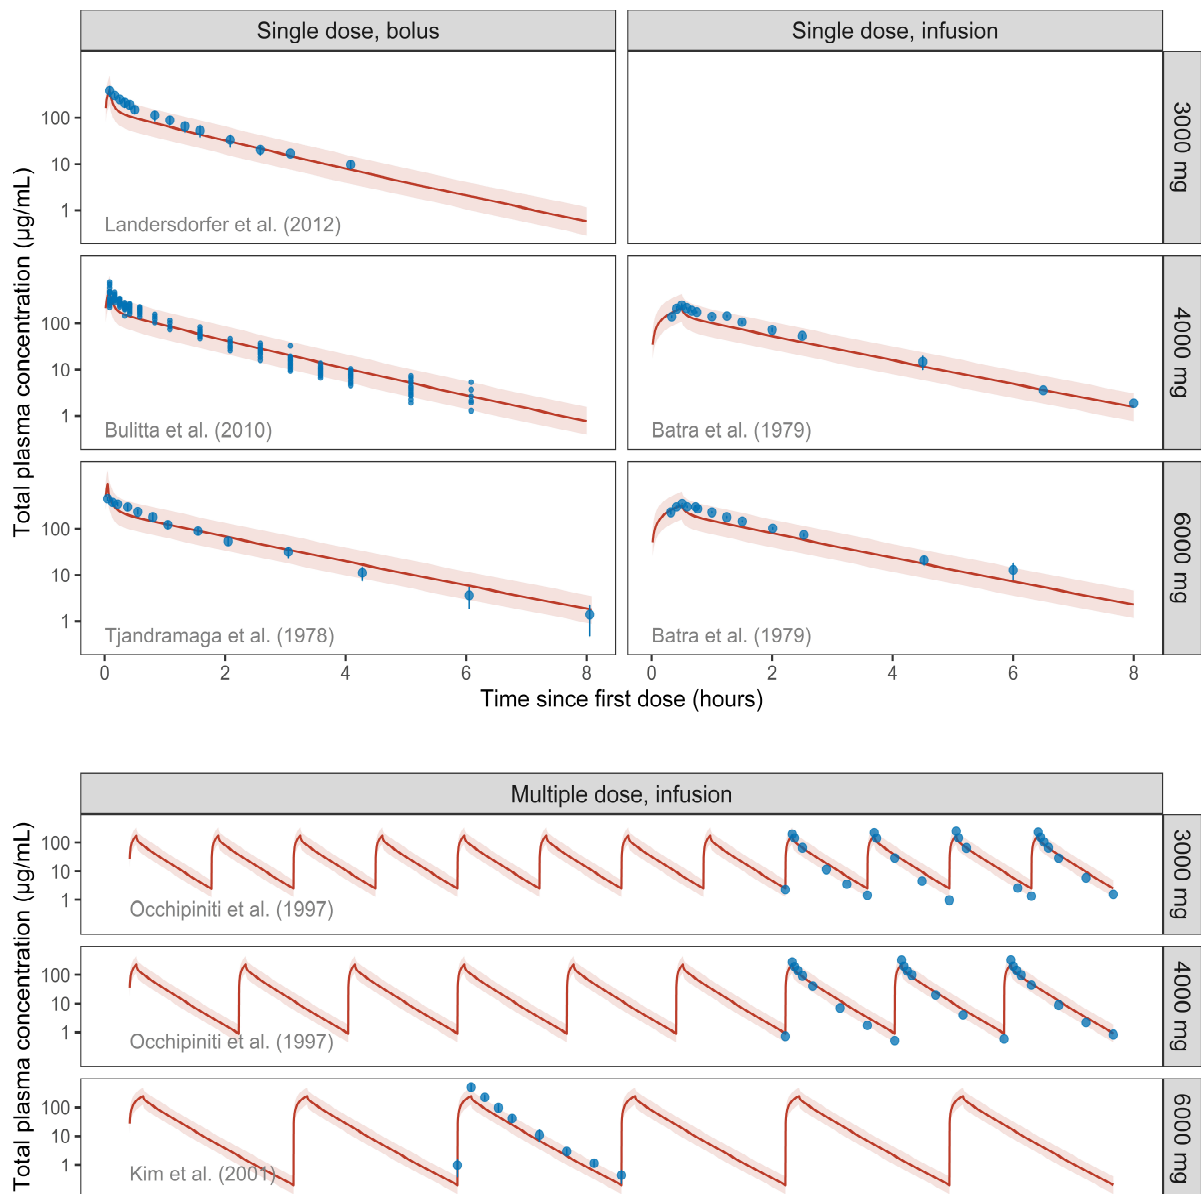

**Figure S1:** Model verification of the piperacillin model in plasma. Mean PBPK predicted (red lines) versus observed total plasma concentrations (blue dots). Smaller dots denote individual concentrations whereas larger symbols denote mean data (with or without error bars signifying standard deviations). The shaded red area represents a two-fold interval around the median PBPK predicted profile. See Table S2 for simulation settings.

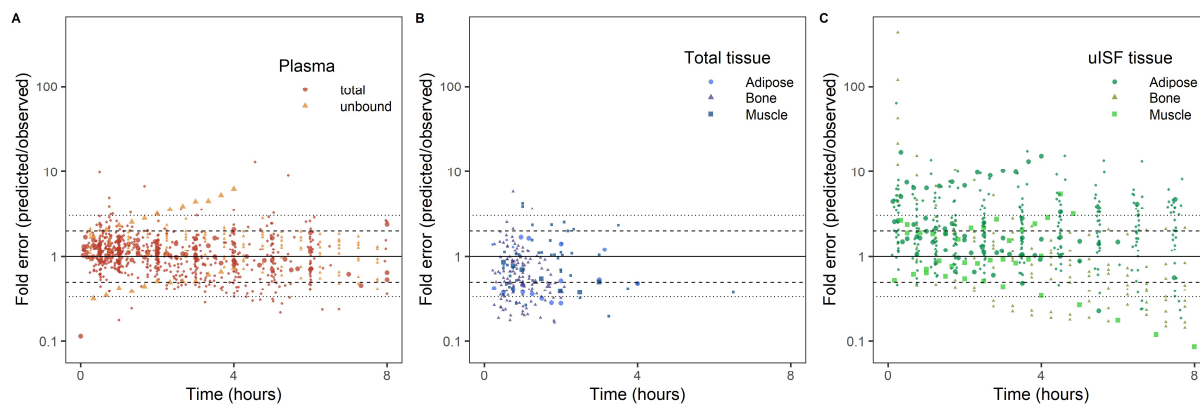

**Figure S2:** Fold errors of physiologically based pharmacokinetic (PBPK) predicted concentrations versus time of the five beta-lactams in plasma (A), total tissue biopsy homogenates (B) and unbound interstitial fluid (uISF) probed by microdialysis (C). Dashed and dotted lines denote two- and threefold deviations from the line of unity, respectively. Smaller squares or circles represent individual datapoints whereas larger symbols denote mean data.

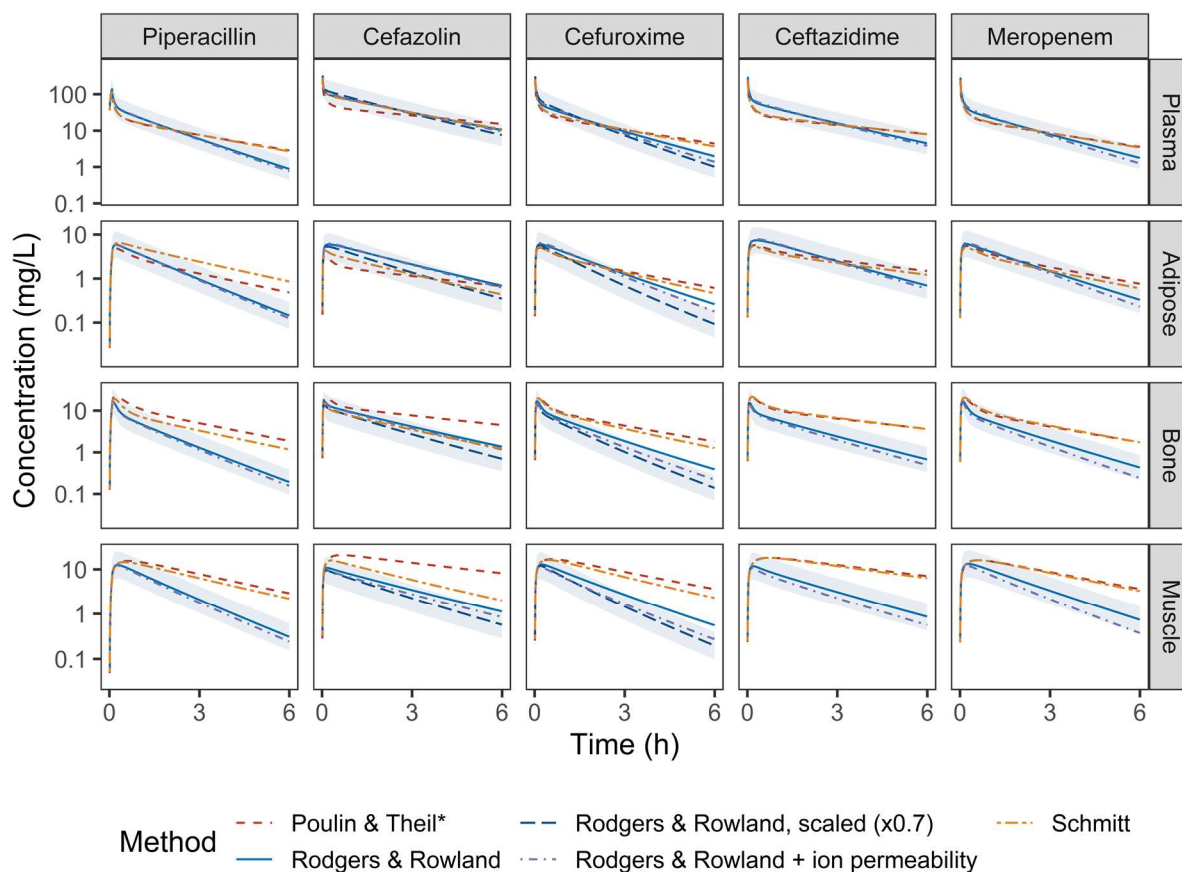

**Figure S3:** PBPK predicted concentrations of the five beta-lactams in plasma and adipose-, bone- and muscle tissues, using four different  $K_p$  estimation methods. All concentrations are total concentrations. For each antibiotic, a 1g intravenous bolus dose was simulated in 100 virtual subjects between 20 and 50 years old. The applied  $K_p$  estimation methods are: Poulin and Theil\*: Poulin and Theil method with a Breshkovsky correction (Method 1 in Simcyp), Rodgers & Rowland (Method 2 in Simcyp), Rodgers & Rowland + ion permeability (Method 3 in Simcyp) and Schmitt: after Schmitt (Schmitt, 2008), using the uniform tissue composition proposed by Utsey *et al.* (Utsey *et al.*, 2020). The shaded area signifies a twofold interval around the prediction with the original  $K_p$  estimation method (Rodgers and Rowland for piperacillin, ceftazidime and meropenem, and Rodgers and Rowland scaled by a factor 0.7 for cefazolin and cefuroxime). Corresponding tissue-to-plasma partition coefficients can be found in supplementary Table S1.

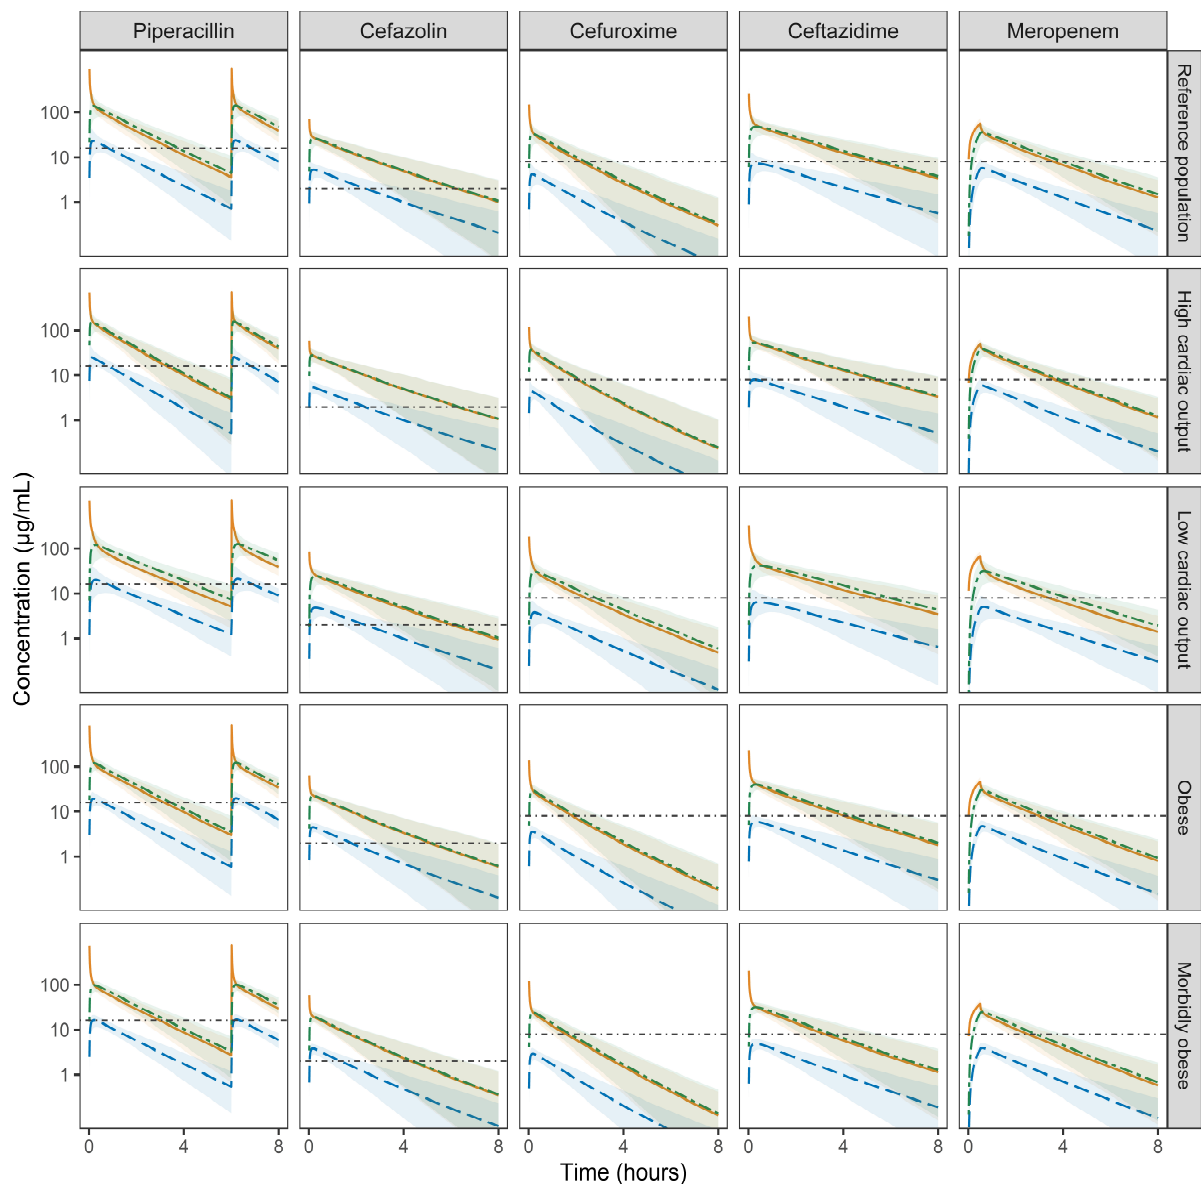

**Figure S4:** PBPK predicted concentrations of the five beta-lactams in plasma (unbound, orange solid line) and adipose tissue (total concentration (blue dashed line) and unbound interstitial fluid concentration (uISF, green dot-dashed line)) for different virtual populations. Standard dosage regimens as recommended by the European Committee on Antimicrobial Susceptibility Testing (EUCAST): piperacillin: 4g (bolus) q6h, cefazolin: 1g (bolus) q8h, cefuroxime: 0.75g (bolus) q8h, ceftazidime: 1g (bolus) q8h, meropenem: 1g (30min infusion) q8h. The shaded areas signify 5-95% percentiles around the mean predicted concentration. The grey line denotes the non-species specific resistant minimal inhibitory concentration (MIC) for each drug.

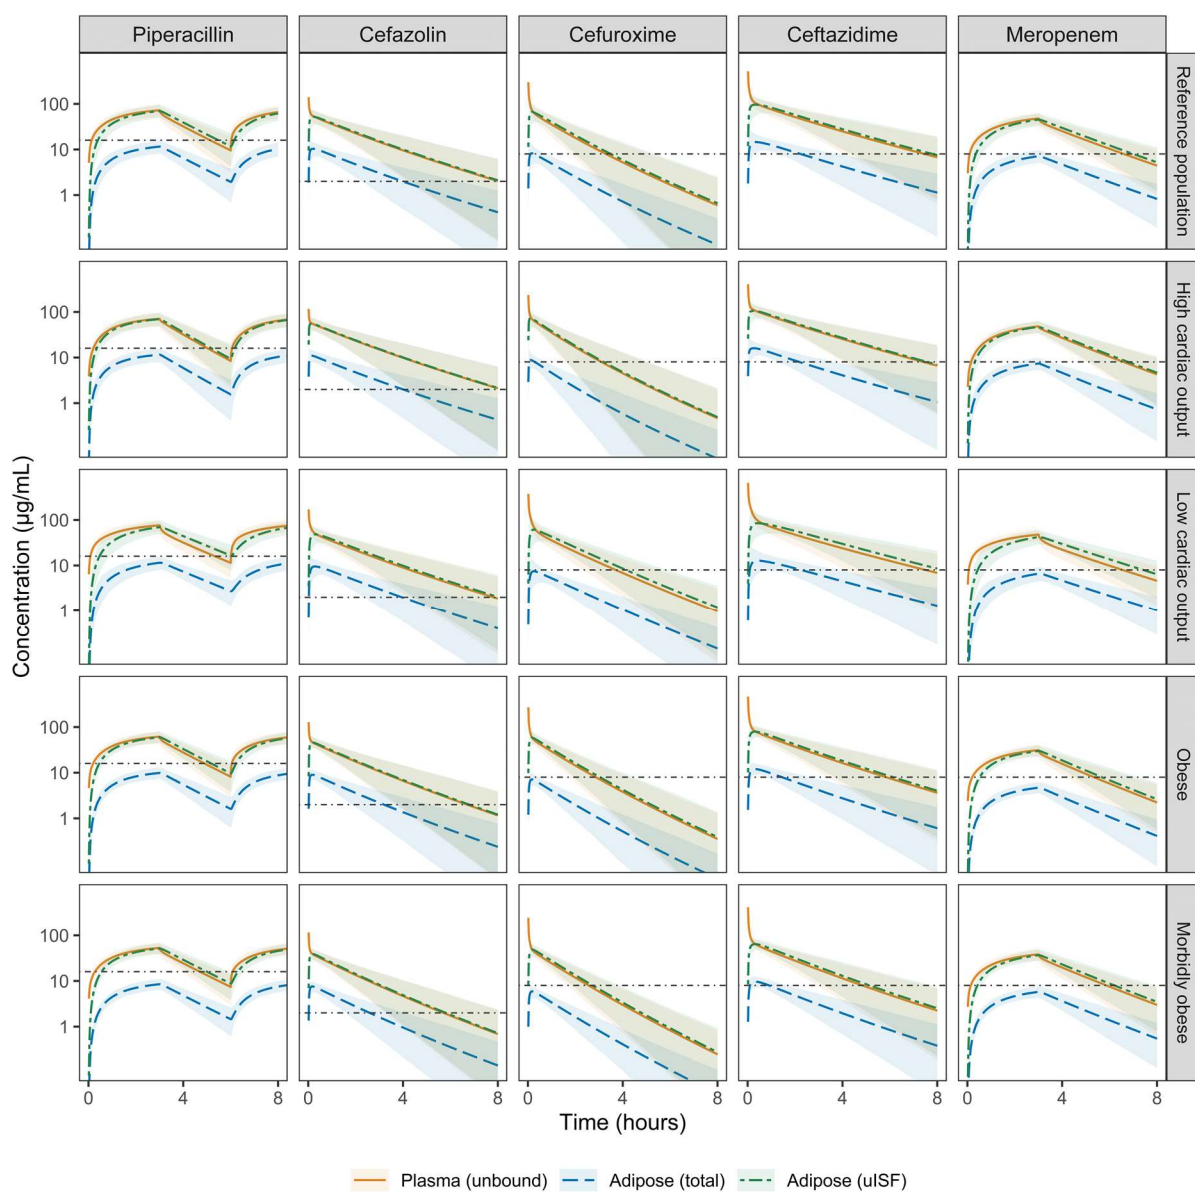

**Figure S5:** PBPK predicted concentrations of the five beta-lactams in plasma (unbound, orange solid line) and adipose tissue (total concentration (blue dashed line) and unbound interstitial fluid concentration (uISF, green dot-dashed line)) for different virtual populations. High dosage regimens as recommended by the European Committee on Antimicrobial Susceptibility Testing (EUCAST): piperacillin: 4g (3h infusion) q6h, cefazolin: 2g (bolus) q8h, cefuroxime: 1.5g (bolus) q8h, ceftazidime: 2g (bolus) q8h, meropenem: 2g (3h infusion) q8h. The shaded areas signify 5-95% percentiles around the mean predicted concentration. The grey line denotes the non-species specific resistant minimal inhibitory concentration (MIC) for each drug.

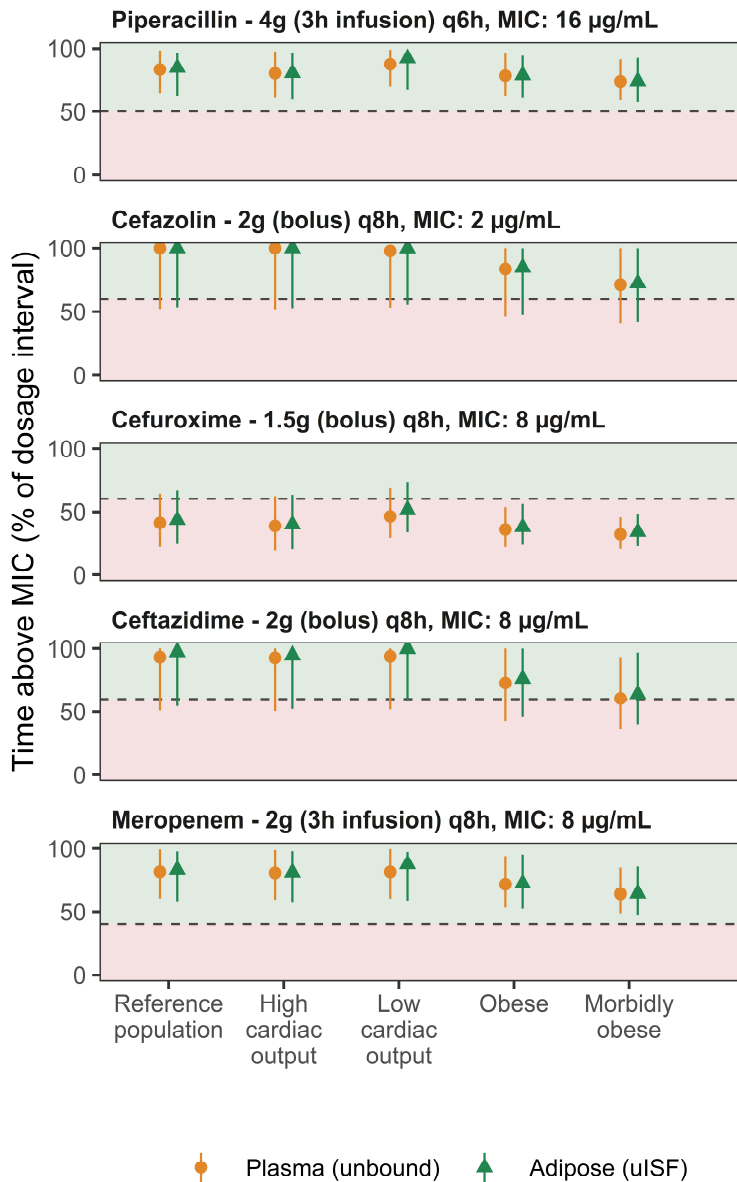

**Figure S6:** Target attainment using high dosages recommended by the European Committee on Antimicrobial Susceptibility Testing (EUCAST) in five different virtual populations using different physiologically based pharmacokinetic (PBPK) predicted concentrations as input. The mean time the unbound plasma concentration (orange circles) and adipose unbound interstitial fluid (uISF) concentration (green triangles) exceed the non-species specific resistant minimal inhibitory concentration breakpoint (MIC) is given as a percentage of the dosage interval, together with 5-95% percentiles (lines). The dashed lines represent conventional antibiotic-specific goals for target attainment. See supplementary Figure S5 and Table S7 for the simulated profiles and population characteristics, respectively.



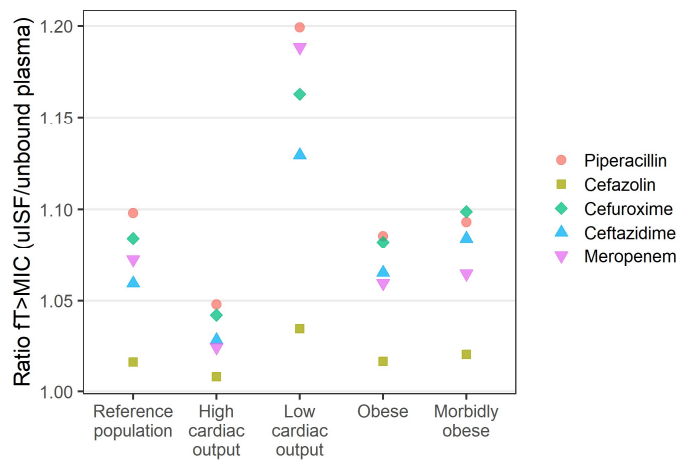

**Figure S7:** Relative differences in target attainment for the standard dosage resulting from using unbound interstitial fluid (uISF) or unbound plasma concentrations as driving factor, expressed as the ratio of time above the minimal inhibitory concentration ( $fT>MIC$ ) in plasma to the  $fT>MIC$  in uISF.

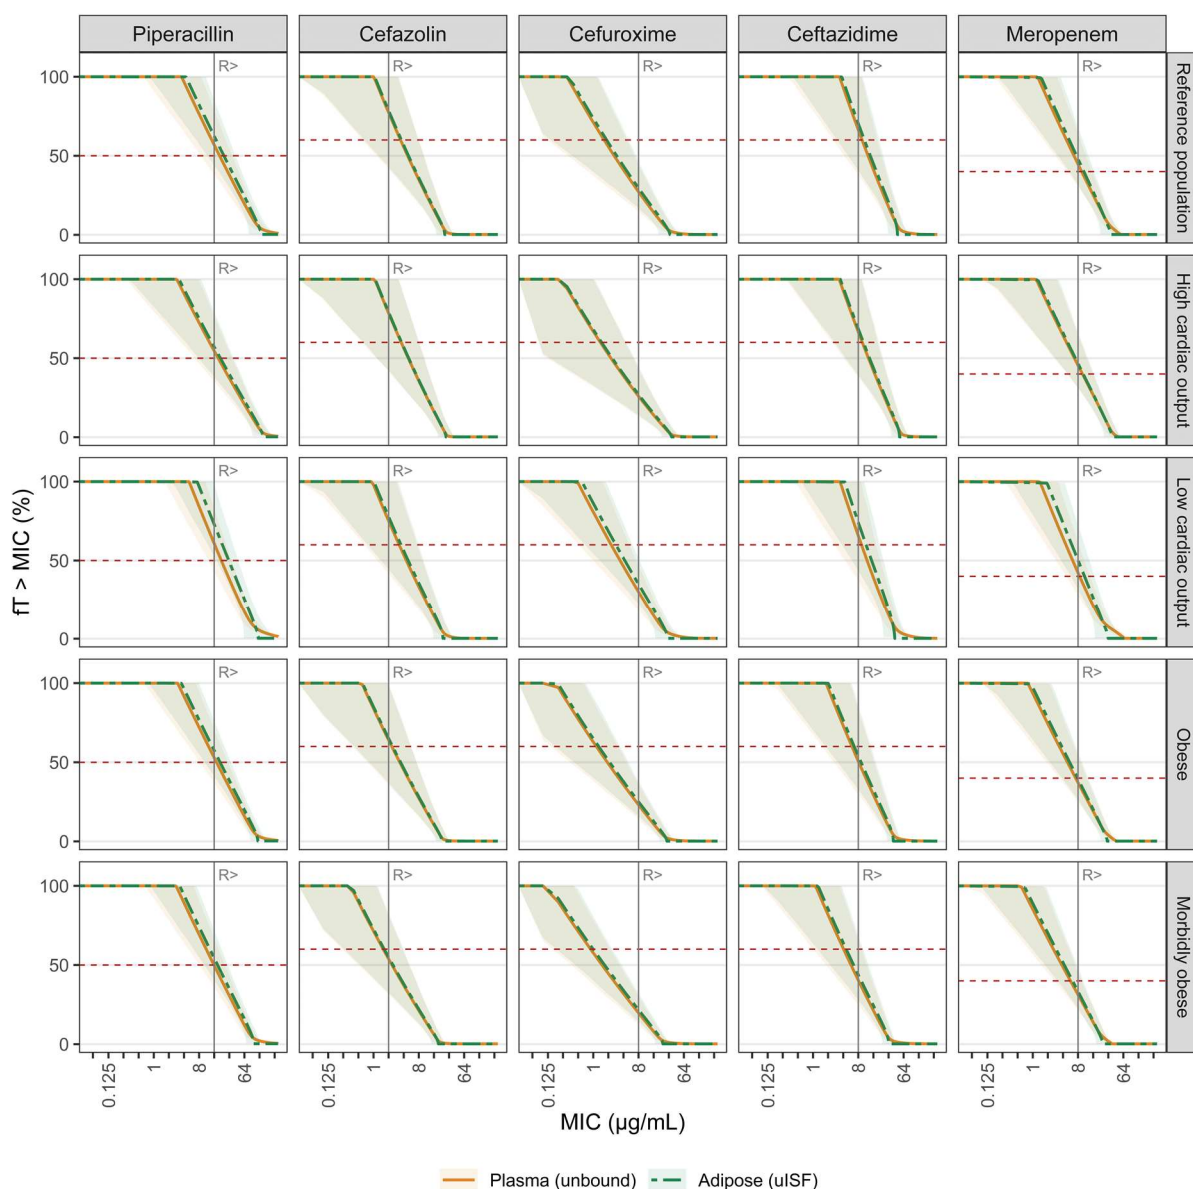

**Figure S8:** Target attainment in function of the minimal inhibitory concentration (MIC) using standard dosages recommended by the European Committee on Antimicrobial Susceptibility Testing (EUCAST) in five different virtual populations. Target attainment is defined as the time the unbound concentration exceeds the MIC ( $fT > MIC$ ), as percentage of the dosing interval and using the physiologically based pharmacokinetic (PBPK) predicted mean unbound concentrations in plasma (orange solid lines) and the interstitial fluid concentration in adipose tissue (uISF, green dot-dashed lines) as inputs (see supplementary Figure S4 for the corresponding concentration-time profiles). The shaded areas represent 5-95% percentiles. The horizontal dashed red lines represent the antibiotic specific targets while the vertical solid grey line represent the non-species specific resistant MIC.

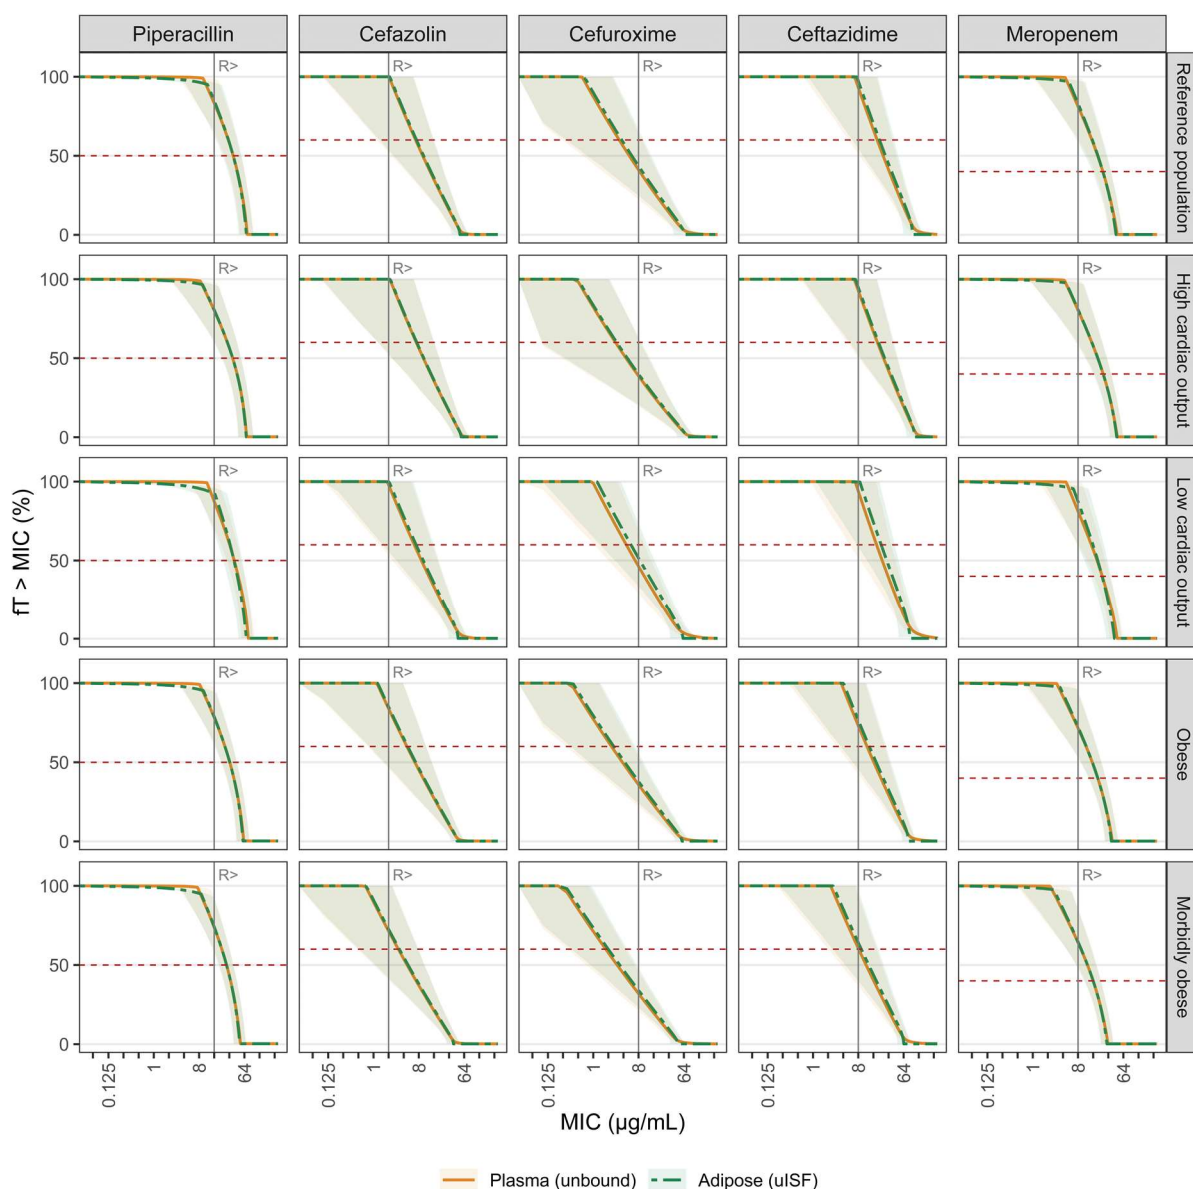

**Figure S9:** Target attainment in function of the minimal inhibitory concentration (MIC) using high dosages recommended by the European Committee on Antimicrobial Susceptibility Testing (EUCAST) in five different virtual populations. Target attainment is defined as the time the unbound concentration exceeds the MIC ( $fT > MIC$ ), as percentage of the dosing interval and using the physiologically based pharmacokinetic (PBPK) predicted mean unbound concentrations in plasma (orange solid lines) and the interstitial fluid concentration in adipose tissue (uISF, green dot-dashed lines) as inputs (see supplementary Figure S5 for the corresponding concentration-time profiles). The shaded areas represent 5-95% percentiles. The horizontal dashed red lines represent the antibiotic specific targets while the vertical solid grey line represent the non-species specific resistant MIC.

## Supplementary Tables S1-8

**Table S1: Variability in tissue-to-plasma partition coefficients (Kp)**

| Drug         | Tissue  | R&R Method | Alternative Kp method (% difference with R&R) |              |               |
|--------------|---------|------------|-----------------------------------------------|--------------|---------------|
|              |         |            | P&T +                                         | R&R+         | Schmitt       |
| Piperacillin | adipose | 0.133      | 0.151 (+14%)                                  | 0.131 (-2%)  | 0.259 (+95%)  |
|              | bone    | 0.207      | 0.610 (+195%)                                 | 0.193 (-7%)  | 0.411 (+99%)  |
|              | muscle  | 0.293      | 0.788 (+169%)                                 | 0.266 (-9%)  | 0.654 (+123%) |
| Cefazolin    | adipose | 0.064*     | 0.043 (-33%)                                  | 0.063 (-2%)  | 0.039 (-39%)  |
|              | bone    | 0.130*     | 0.289 (+122%)                                 | 0.120 (-8%)  | 0.111 (-15%)  |
|              | muscle  | 0.107*     | 0.495 (+363%)                                 | 0.087 (-19%) | 0.175 (+64%)  |
| Cefuroxime   | adipose | 0.117*     | 0.128 (+9%)                                   | 0.113 (-3%)  | 0.112 (-4%)   |
|              | bone    | 0.190*     | 0.394 (+107%)                                 | 0.153 (-19%) | 0.329 (+73%)  |
|              | muscle  | 0.251*     | 0.676 (+169%)                                 | 0.179 (-29%) | 0.521 (+108%) |
| Ceftazidime  | adipose | 0.136      | 0.172 (+26%)                                  | 0.134 (-1%)  | 0.144 (+6%)   |
|              | bone    | 0.147      | 0.441 (+200%)                                 | 0.126 (-14%) | 0.441 (+200%) |
|              | muscle  | 0.181      | 0.768 (+326%)                                 | 0.139 (-23%) | 0.698 (+286%) |
| Meropenem    | adipose | 0.154      | 0.188 (+22%)                                  | 0.149 (-3%)  | 0.157 (+2%)   |
|              | bone    | 0.231      | 0.460 (+99%)                                  | 0.184 (-20%) | 0.480 (+108%) |
|              | muscle  | 0.351      | 0.800 (+128%)                                 | 0.259 (-26%) | 0.760 (+117%) |

**P&T+:** Poulin & Theil method (Poulin and Theil, 2002) with a Berezhovskiy correction (Berezhovskiy, 2004), implemented as "method 1" in Simcyp V20,

**R&R:** Rodgers & Rowland method (Rodgers and Rowland, 2007), implemented as "method 2" in Simcyp V20 (input values),

**R&R ±:** Rodgers & Rowland + ionization method, implemented as "method 3" in Simcyp V20,

**Schmitt:** Schmitt method (Schmitt, 2008), calculated using uniform tissue composition (Utsey *et al.*, 2020),

\*: input Kp value in the model is scaled by a factor 0.7 (Hsu *et al.*, 2014; Abduljalil *et al.*, 2022)

**Table S2: Model verification of the piperacillin model in plasma**

| Study                                | Simulation parameter        |    |                        |         | Plasma profiles |      | Area under the plasma concentration-time curve (AUC) |                      |                       |      |
|--------------------------------------|-----------------------------|----|------------------------|---------|-----------------|------|------------------------------------------------------|----------------------|-----------------------|------|
|                                      | IV dose (infusion duration) | N  | Age in years (min-max) | Females | AFE             | AAFE | AUC interval                                         | Observed (mg.min/mL) | Predicted (mg.min/mL) | FE   |
| (Landersdorfer <i>et al.</i> , 2012) | 3g (5min) SD                | 10 | 19-29                  | 50%     | 0.73            | 1.37 | N.R.                                                 | N.R.                 | N.R.                  | N.R. |
| (Bulitta <i>et al.</i> , 2010)       | 4g (5min) SD                | 4  | 22-24                  | 50%     | 1.02            | 1.43 | N.R.                                                 | N.R.                 | N.R.                  | N.R. |
| (Tjandramaga <i>et al.</i> , 1978)   | 6g (3min) SD                | 5  | 18-29                  | 0%      | 1.07            | 1.31 | 0-inf                                                | 438                  | 436                   | 1.00 |
| (Batra <i>et al.</i> , 1979)         | 4g (30min) SD               | 6  | 18-50                  | 0%      | 0.79            | 1.31 | 0-6h                                                 | 371                  | 286                   | 0.77 |
| (Batra <i>et al.</i> , 1979)         | 6g (30min) SD               | 6  | 18-50                  | 0%      | 0.76            | 1.33 | 0-6h                                                 | 470                  | 429                   | 0.91 |
| (Occhipinti <i>et al.</i> , 1997)    | 3g (30 min) q6h             | 12 | 23-30                  | 0%      | 1.16            | 1.44 | 48-72h                                               | 968                  | 860                   | 0.89 |
| (Occhipinti <i>et al.</i> , 1997)    | 4g (30min) q8h              | 12 | 23-30                  | 0%      | 1.05            | 1.36 | 48-72h                                               | 979                  | 860                   | 0.88 |
| (Kim <i>et al.</i> , 2001)           | 6g (60 min) q12h            | 12 | 20-43                  | 33%     | 0.48            | 2.10 | 24-36h                                               | 962                  | 434                   | 0.45 |
| Overall AFE                          |                             |    |                        |         | 0.85            |      | 0.84                                                 |                      |                       |      |
| Overall AAFE                         |                             |    |                        |         | 1.44            |      | 1.19                                                 |                      |                       |      |

Abbreviations: AAFE: absolute average fold error, AFE: average fold error, FE: fold error, IV: intravenous, N: number of study subjects, simulations were done with N\*10 virtual subjects, N.R.: not reported, SD: single dose

**Table S3: Study selection process**

| Drug – tissue pair<br>(Study reference)                                                                                                                                                                                                                                                                                   | Study inclusion decision <sup>a</sup>                                                                                                                                                                                                                                                                                                                                                                                                                                                                                                                                                                            |
|---------------------------------------------------------------------------------------------------------------------------------------------------------------------------------------------------------------------------------------------------------------------------------------------------------------------------|------------------------------------------------------------------------------------------------------------------------------------------------------------------------------------------------------------------------------------------------------------------------------------------------------------------------------------------------------------------------------------------------------------------------------------------------------------------------------------------------------------------------------------------------------------------------------------------------------------------|
| <b>Piperacillin – adipose (total)</b><br>(Kinzig <i>et al.</i> , 1992)<br>(van Lindert <i>et al.</i> , 1990)<br>(Russo <i>et al.</i> , 1982)                                                                                                                                                                              | <u>Included</u><br>Not preferred, not newest<br>Not preferred, not newest                                                                                                                                                                                                                                                                                                                                                                                                                                                                                                                                        |
| <b>Piperacillin – bone (total)</b><br>(Al-Nawas <i>et al.</i> , 2008)<br>(Incavo <i>et al.</i> , 1994)<br>(Kato and Morimoto, 1984)                                                                                                                                                                                       | Excluded, unsuitable tissue data (sample time unclear)<br><u>Included</u><br>Not preferred, older study & full text in Japanese                                                                                                                                                                                                                                                                                                                                                                                                                                                                                  |
| <b>Piperacillin – muscle (total)</b><br>(Kinzig <i>et al.</i> , 1992)<br>(Russo <i>et al.</i> , 1982)<br>(Daschner <i>et al.</i> , 1982)<br>(Daschner <i>et al.</i> , 1981)                                                                                                                                               | <u>Included</u><br>Not preferred, older study<br>Excluded, unsuitable tissue data (hypothermic tissue 25-35°C)<br>Excluded, unsuitable tissue data (time intervals)                                                                                                                                                                                                                                                                                                                                                                                                                                              |
| <b>Piperacillin – adipose (uISF)</b><br>(Busse <i>et al.</i> , 2021 a)<br>(Joukhadar <i>et al.</i> , 2001)<br>(Brunner <i>et al.</i> , 2000)<br>(Nolting <i>et al.</i> , 1996)                                                                                                                                            | <u>Included</u><br>Not preferred, already included (Piperacillin - muscle ISF)<br><u>Included</u> , substitutes missing data in bone ISF<br>Not preferred, dosing mg/kg without individual bodyweight                                                                                                                                                                                                                                                                                                                                                                                                            |
| <b>Piperacillin – bone (uISF)</b><br>No studies found                                                                                                                                                                                                                                                                     |                                                                                                                                                                                                                                                                                                                                                                                                                                                                                                                                                                                                                  |
| <b>Piperacillin – muscle (uISF)</b><br>(Joukhadar <i>et al.</i> , 2001)<br>(Brunner <i>et al.</i> , 2000)                                                                                                                                                                                                                 | <u>Included</u><br>Not preferred, already included (Piperacillin - muscle ISF)                                                                                                                                                                                                                                                                                                                                                                                                                                                                                                                                   |
| <b>Cefazolin – adipose (total)</b><br>(Tchaick <i>et al.</i> , 2017)<br>(Kram <i>et al.</i> , 2017)<br>(Young <i>et al.</i> , 2015)<br>(Maggio <i>et al.</i> , 2015)<br>(Ohge <i>et al.</i> , 1999)                                                                                                                       | Not preferred, population less suited (CPB)<br>Excluded, unsuitable tissue data (obese)<br>Excluded, unsuitable tissue data (obese)<br>Excluded, unsuitable tissue data (obese)<br><u>Included</u>                                                                                                                                                                                                                                                                                                                                                                                                               |
| <b>Cefazolin – bone (total)</b><br>(Yamada <i>et al.</i> , 2011)<br>(Deacon <i>et al.</i> , 1996)<br>(Friedman <i>et al.</i> , 1990)<br>(Williams <i>et al.</i> , 1983)<br>(Polk <i>et al.</i> , 1983)<br>(Tetzlaff <i>et al.</i> , 1978)<br>(Cunha <i>et al.</i> , 1977)                                                 | <u>Included</u><br>Not preferred, lack of plasma data<br>Not preferred, older study<br>Not preferred, older study<br>Not preferred, older study<br>Excluded, in children and unsuitable tissue data (infected bone)<br>Not preferred, older study                                                                                                                                                                                                                                                                                                                                                                |
| <b>Cefazolin – muscle (total)</b><br>(Dudley <i>et al.</i> , 1984)<br>(Polk <i>et al.</i> , 1982)<br>(Sinagowitz <i>et al.</i> , 1976)                                                                                                                                                                                    | Not preferred, population less suited (cardiac surgery)<br>Not preferred, population less suited (cardiac surgery)<br><u>Included</u>                                                                                                                                                                                                                                                                                                                                                                                                                                                                            |
| <b>Cefazolin – adipose (uISF)</b><br>(Palma <i>et al.</i> , 2018)<br>(Himebauch <i>et al.</i> , 2016)<br>(Roberts <i>et al.</i> , 2015)<br><br>(Brill <i>et al.</i> , 2014)<br>(Andreas <i>et al.</i> , 2013)<br>(Bhalodi <i>et al.</i> , 2013)<br>(Douglas <i>et al.</i> , 2011)<br><br>(Hutschala <i>et al.</i> , 2007) | Excluded, unsuitable tissue data (obese)<br>Excluded, study in adolescents (12-17 year)<br><u>Included</u> , substitutes missing bone data study, population less suited (critically ill patients) but no better alternative study available<br><u>Included</u> , most suited study<br>Not preferred, population less suited (normothermic CPB)<br>Excluded, unsuitable tissue data (infected tissue)<br><u>Included</u> , substitutes missing muscle data study, population less suited (cardiac surgery) but no better alternative study available<br>Not preferred, population less suited (normothermic CPB) |
| <b>Cefazolin – bone (uISF)</b><br>(Andreas <i>et al.</i> , 2015)                                                                                                                                                                                                                                                          | Not preferred, unclear when second dose was administered                                                                                                                                                                                                                                                                                                                                                                                                                                                                                                                                                         |
| <b>Cefazolin – muscle (uISF)</b><br>No studies found                                                                                                                                                                                                                                                                      |                                                                                                                                                                                                                                                                                                                                                                                                                                                                                                                                                                                                                  |
| <b>Cefuroxime – adipose (total)</b><br>(Lovering <i>et al.</i> , 1997)<br>(Alfter <i>et al.</i> , 1995)                                                                                                                                                                                                                   | Not preferred, lack of plasma data (only blood)<br>Not preferred, plasma data not suited (time intervals)                                                                                                                                                                                                                                                                                                                                                                                                                                                                                                        |

|                                              |                                                                                                  |
|----------------------------------------------|--------------------------------------------------------------------------------------------------|
| (Huizinga <i>et al.</i> , 1989)              | <u>Included</u>                                                                                  |
| (Johnson, 1987)                              | Not preferred, lack of plasma data                                                               |
| (Adam <i>et al.</i> , 1979)                  | Not preferred, older study and full text unavailable                                             |
| <b>Cefuroxime – bone (total)</b>             |                                                                                                  |
| (Gergs <i>et al.</i> , 2020)                 | <u>Included</u>                                                                                  |
| (Gergs <i>et al.</i> , 2014)                 | Not preferred, older study                                                                       |
| (Garazzino <i>et al.</i> , 2011)             | Excluded, unsuitable tissue data (septic tissue)                                                 |
| (Vuorisalo <i>et al.</i> , 2000)             | Excluded, unsuitable tissue data (sample time unclear)                                           |
| (Katzner <i>et al.</i> , 1997)               | Not preferred, older study                                                                       |
| (Kaukonen <i>et al.</i> , 1995)              | Not preferred, plasma data not suited (time intervals)                                           |
| (Nungu <i>et al.</i> , 1995)                 | Excluded, unsuitable tissue data (sample time unclear)                                           |
| (Alvarez Ferrero <i>et al.</i> , 1994)       | Not preferred, older study                                                                       |
| (Rout and Frame, 1992)                       | Excluded, unsuitable tissue data (time intervals)                                                |
| (Johnson, 1987)                              | Not preferred, lack of plasma data                                                               |
| (Davies <i>et al.</i> , 1986)                | Not preferred, older study                                                                       |
| (Hughes <i>et al.</i> , 1982)                | Not preferred, older study                                                                       |
| (Leigh <i>et al.</i> , 1982)                 | Not preferred, older study                                                                       |
| (Lovering <i>et al.</i> , 1997)              | Not preferred, lack of plasma data (only blood)                                                  |
| <b>Cefuroxime – muscle (total)</b>           |                                                                                                  |
| (Alfter <i>et al.</i> , 1995)                | Not preferred, plasma data not available as with Kaukonen <i>et al.</i> 1995 but less datapoints |
| (Kaukonen <i>et al.</i> , 1995)              | <u>Included</u> , no plasma data available but more datapoints than Alfter <i>et al.</i> 1995    |
| (Connors <i>et al.</i> , 1990)               | Excluded, unsuitable tissue data (sample time unclear)                                           |
| <b>Cefuroxime – adipose (uISF)</b>           |                                                                                                  |
| (Hanberg <i>et al.</i> , 2021)               | <u>Included</u>                                                                                  |
| (Hanberg <i>et al.</i> , 2020)               | Not preferred, older study and lack of plasma data                                               |
| (Tøttrup <i>et al.</i> , 2019)               | Not preferred, older study                                                                       |
| (Skhirtladze-Dworschak <i>et al.</i> , 2019) | Not preferred, population less suited (CPB)                                                      |
| (Barbour <i>et al.</i> , 2009)               | Excluded, unsuitable tissue data (obese)                                                         |
| <b>Cefuroxime – bone (uISF)</b>              |                                                                                                  |
| (Hanberg <i>et al.</i> , 2021)               | Not preferred, study already included (Cefuroxime - adipose uISF)                                |
| (Hanberg <i>et al.</i> , 2020)               | Not preferred, lack of plasma data                                                               |
| (Tøttrup <i>et al.</i> , 2019)               | <u>Included</u>                                                                                  |
| <b>Cefuroxime – muscle (uISF)</b>            |                                                                                                  |
| (Hanberg <i>et al.</i> , 2021)               | Not preferred, (already included (Cefuroxime - adipose uISF))                                    |
| (Hanberg <i>et al.</i> , 2020)               | Not preferred, no plasma data                                                                    |
| (Skhirtladze-Dworschak <i>et al.</i> , 2019) | Not preferred, population less suited (CPB)                                                      |
| (Schwameis <i>et al.</i> , 2017)             | <u>Included</u>                                                                                  |
| (Barbour <i>et al.</i> , 2009)               | Not preferred, population less suited (obese)                                                    |
| (Pojar <i>et al.</i> , 2008)                 | Excluded, unsuitable tissue data (time intervals)                                                |
| <b>Ceftazidime – adipose (total)</b>         |                                                                                                  |
| (Raymakers <i>et al.</i> , 1998)             | Excluded, unsuitable tissue data (amputated/infected limb)                                       |
| (Dounis <i>et al.</i> , 1995)                | Not preferred, lack of plasma data                                                               |
| (Papaioannou <i>et al.</i> , 1994)           | Excluded, unsuitable tissue data (time-intervals)                                                |
| (Frank <i>et al.</i> , 1987)                 | Excluded, unsuitable tissue data (time-intervals + hypothermic tissue (25-35°C) )                |
| (Loebis, 1986)                               | <u>Included</u>                                                                                  |
| (Adam <i>et al.</i> , 1983)                  | Not preferred, population less suited (cardiac surgery)                                          |
| <b>Ceftazidime – bone (total)</b>            |                                                                                                  |
| (Lozano-Alonso <i>et al.</i> , 2016)         | Excluded, unsuitable tissue data (amputated/infected limb)                                       |
| (Dounis <i>et al.</i> , 1995)                | Not preferred, lack of plasma data                                                               |
| (Papaioannou <i>et al.</i> , 1994)           | Excluded, unsuitable tissue data (time intervals)                                                |
| (Leigh <i>et al.</i> , 1985)                 | Excluded, unsuitable tissue data (time intervals)                                                |
| (Adam <i>et al.</i> , 1983)                  | Not preferred, population less suited (cardiac surgery)                                          |
| (Wittmann <i>et al.</i> , 1981)              | <u>Included</u>                                                                                  |
| <b>Ceftazidime – muscle (total)</b>          |                                                                                                  |
| (Lozano-Alonso <i>et al.</i> , 2016)         | Excluded, unsuitable tissue data (amputated/infected limb)                                       |
| (Dounis <i>et al.</i> , 1995)                | Not preferred, lack of plasma data                                                               |
| (Papaioannou <i>et al.</i> , 1994)           | Excluded, unsuitable tissue data (time intervals)                                                |
| (Frank <i>et al.</i> , 1987)                 | Excluded, unsuitable tissue data (hypothermic tissue 25-35°C)                                    |
| (Loebis, 1986)                               | <u>Included</u>                                                                                  |
| (Adam <i>et al.</i> , 1983)                  | Not preferred, population less suited (cardiac surgery)                                          |

|                                                                                                                                                                                                                                             |                                                                                                                                                                                                                                                                                           |
|---------------------------------------------------------------------------------------------------------------------------------------------------------------------------------------------------------------------------------------------|-------------------------------------------------------------------------------------------------------------------------------------------------------------------------------------------------------------------------------------------------------------------------------------------|
| <b>Ceftazidime – adipose (uISF)</b><br>(Tuma <i>et al.</i> , 2022)                                                                                                                                                                          | Excluded, unsuitable tissue data (diabetic/infected foot)                                                                                                                                                                                                                                 |
| <b>Ceftazidime – bone (uISF)</b><br>No studies found                                                                                                                                                                                        |                                                                                                                                                                                                                                                                                           |
| <b>Ceftazidime – muscle (uISF)</b><br>No studies found                                                                                                                                                                                      |                                                                                                                                                                                                                                                                                           |
| <b>Meropenem - adipose (total)</b><br>No studies found                                                                                                                                                                                      |                                                                                                                                                                                                                                                                                           |
| <b>Meropenem – bone (total)</b><br>(Lozano-Alonso <i>et al.</i> , 2016)<br>(Sano <i>et al.</i> , 1993)                                                                                                                                      | Excluded, unsuitable tissue data (amputated/infected limb)<br><u>Included</u>                                                                                                                                                                                                             |
| <b>Meropenem – muscle (total)</b><br>(Lozano-Alonso <i>et al.</i> , 2016)<br>(Condon <i>et al.</i> , 1997)<br>(Newsom <i>et al.</i> , 1995)                                                                                                 | Excluded, unsuitable tissue data (amputated/infected limb)<br>Excluded, unsuitable tissue data (time intervals)<br><u>Included</u> , population less suited (cardiac surgery) but no alternative study available                                                                          |
| <b>Meropenem – adipose (uISF)</b><br>(Busse <i>et al.</i> , 2021 b)<br>(Simon <i>et al.</i> , 2020)<br>(Hanberg <i>et al.</i> , 2018)<br>(Varghese <i>et al.</i> , 2015)<br>(Wittau <i>et al.</i> , 2015)<br>(Roberts <i>et al.</i> , 2009) | <u>Included</u><br><u>Included</u> , "substitutes" missing bone uISF study<br>Not preferred, population less suited (CPB)<br>Not preferred, population less suited (hemodiafiltration)<br>Not preferred, population less suited (obese)<br>Not preferred, population less suited (septic) |
| <b>Meropenem – bone (uISF)</b><br>No studies found                                                                                                                                                                                          |                                                                                                                                                                                                                                                                                           |
| <b>Meropenem – muscle (uISF)</b><br>(Tomaselli <i>et al.</i> , 2004)                                                                                                                                                                        | <u>Included</u> , population less suited (pneumonia) but no alternative studies available                                                                                                                                                                                                 |

<sup>a</sup>: When multiple studies were available for a given tissue-drug pair, a single study was selected (“included”) based on the predefined criteria noted in the methods section of the manuscript. Studies which were eligible for inclusion but were not selected are denoted as “not preferred”.

Abbreviations: CPB: cardio pulmonary bypass, uISF: unbound interstitial fluid.



**Table S4: Demographic data of included studies**

| Drug - matrix pair      | Population                                                                                                               | Type and location of tissue sample                                   | Age (years) <sup>a</sup> | Bodyweight (kg) <sup>a</sup>             | Reported renal function <sup>a</sup>                                              | Reference                         |
|-------------------------|--------------------------------------------------------------------------------------------------------------------------|----------------------------------------------------------------------|--------------------------|------------------------------------------|-----------------------------------------------------------------------------------|-----------------------------------|
| <b>Piperacillin</b>     |                                                                                                                          |                                                                      |                          |                                          |                                                                                   |                                   |
| Adipose (total)         | Patients undergoing colorectal surgery for rectal-, colon- or sigmoid cancer, tubovillous adenoma or colostomy/ileostomy | Nontumorous abdominal subcutaneous fat                               | 66.8 ± 12 (29-77)        | 72.3 ± 11.4 (53-93)                      | "all patients were found to have normal kidney function in relation to their age" | (Kinzig <i>et al.</i> , 1992)     |
| Bone (total)            | Patients undergoing an elective total hip replacement                                                                    | Femoral cancellous bone                                              | 63.4 (44-86)             | (45-102)                                 | Excluded if CrCL <40mL/min or sCr >2.5mg/dl                                       | (Incavo <i>et al.</i> , 1994)     |
| Skeletal muscle (total) | Patients undergoing cholecystectomy or sphincteroplasty (biliary tract surgery)                                          | Abdominal skeletal muscle                                            | 46 (21-74)               | N.R.                                     | CrCL: (51 - 106) mL/min                                                           | (Russo <i>et al.</i> , 1982)      |
| Adipose (uISF)          | Patients undergoing elective abdominal surgery (non-obese cohort)                                                        | Subcutaneous adipose tissue of both upper arms                       | >18                      | 75 (67-84)                               | CrCL: (75.1 - 106 )mL/min                                                         | (Busse <i>et al.</i> , 2021 a)    |
| Adipose (uISF)          | Healthy control group                                                                                                    | Subcutaneous adipose layer of the thigh                              | (25-37)                  | 81 ± 5                                   | "Normal kidney function tests"                                                    | (Brunner <i>et al.</i> , 2000)    |
| Skeletal muscle (uISF)  | Healthy control group                                                                                                    | Skeletal muscle                                                      | 66 ± 3                   | 76 ± 5                                   | sCr: 1.06 ± 0.06 mg/dL                                                            | (Joukhadar <i>et al.</i> , 2001)  |
| <b>Cefazolin</b>        |                                                                                                                          |                                                                      |                          |                                          |                                                                                   |                                   |
| Adipose (total)         | Patients undergoing pancreatic surgery                                                                                   | Subcutaneous abdominal adipose tissue                                | (52-79)                  | N.R., BMI: (16.8-27.5) kg/m <sup>2</sup> | CrCL ≥ 60 ml/min                                                                  | (Ohge <i>et al.</i> , 1999)       |
| Bone (total)            | Patients undergoing total hip arthroplasty or total knee arthroplasty                                                    | Cancellous bone from the femur or tibia                              | 74.8 ± 7.9               | 55.4 ± 8.2 (41-75)                       | sCr: 0.7 ± 0.2 (all < 1.5) mg/dL                                                  | (Yamada <i>et al.</i> , 2011)     |
| Skeletal muscle (total) | Patients undergoing urological operations                                                                                | Abdominal skeletal muscle which macroscopically looked well perfused | N.R.                     | N.R.                                     | N.R.                                                                              | (Sinagowitz <i>et al.</i> , 1976) |
| Adipose (uISF)          | Non-obese patients undergoing Toupet fundoplication                                                                      | Subcutaneous abdominal adipose tissue                                | 52.7 ± 6.3 (42-61)       | 86.2 (72-109)                            | Excluded if eGFR < 60 mL/min                                                      | (Brill <i>et al.</i> , 2014)      |
| Adipose (uISF)          | Patients after major trauma and low to moderate illness severity                                                         | Subcutaneous tissue                                                  | 37 ± 14 (19-65)          | 87 ± 23 (60-175)                         | CrCL: 163 ±44 (50-253) mL/min, sCr: 19.7 (40-145) μmol/L                          | (Roberts <i>et al.</i> , 2015)    |
| Adipose (uISF)          | Patients undergoing semi elective abdominal aortic aneurism open repair surgery                                          | Subcutaneous tissue of the upper arm                                 | 70 (59-81)               | 88 (80-128)                              | CrCL: 98 (37-236) mL/min , sCr: 88 (68-137) μmol/L                                | (Douglas <i>et al.</i> , 2011)    |
| <b>Cefuroxime</b>       |                                                                                                                          |                                                                      |                          |                                          |                                                                                   |                                   |
| Adipose (total)         | Patients undergoing elective abdominal operations                                                                        | Subcutaneous adipose tissue of the abdomen                           | 42.6 (27-66)             | 71.6 ± 6.8                               | "All patients had normal renal function"                                          | (Huizinga <i>et al.</i> , 1989)   |

|                         |                                                                                                                              |                                                       |                     |                                        |                                                         |                                  |
|-------------------------|------------------------------------------------------------------------------------------------------------------------------|-------------------------------------------------------|---------------------|----------------------------------------|---------------------------------------------------------|----------------------------------|
| Bone (total)            | Patients undergoing hip surgery                                                                                              | Cancellous pelvic bone                                | 65 ± 9.1            | N.R., BMI 27.7 ± 3.5 kg/m <sup>2</sup> | Excluded if sCr > 130 µmol/L                            | (Gergs <i>et al.</i> , 2020)     |
| Skeletal muscle (total) | Patients with hip fracture undergoing hemiarthroplasty                                                                       | Skeletal muscle of the thigh                          | 81 (59-96)          | 58 (39-100)                            | N.R.                                                    | (Kaukonen <i>et al.</i> , 1995)  |
| Adipose (uISF)          | Patients undergoing hallux valgus or hallux rigidus surgery                                                                  | Subcutaneous tissue from non-tourniquet mid-lower leg | 58 (45-67)          | 72 (56-89)                             | sCr: 75 (60-90) µmol/L                                  | (Hanberg <i>et al.</i> , 2021)   |
| Bone (uISF)             | Patients undergoing a total knee replacement                                                                                 | Cancellous tibia bone                                 | 68.7 (58-76)        | 99 (73-110)                            | sCr: 76 (64-99) µmol/L                                  | (Tøttrup <i>et al.</i> , 2019)   |
| Skeletal muscle (uISF)  | Patients undergoing an elective knee arthroscopy                                                                             | Skeletal muscle of the thigh                          | 34.2 ± 13.6 (45-67) | N.R.                                   | N.R.                                                    | (Schwameis <i>et al.</i> , 2017) |
| <b>Ceftazidime</b>      |                                                                                                                              |                                                       |                     |                                        |                                                         |                                  |
| Adipose (total)         | Surgical patients ( gynecological and other cases)                                                                           | Fatty tissue                                          | N.R.                | (34-75)                                | N.R.                                                    | (Loebis, 1986)                   |
| Bone (total)            | Patients undergoing a total hip arthroplasty                                                                                 | Bone from the femur or pelvis                         | 58.4 ± 10.2         | N.R.                                   | "Normal renal function"                                 | (Wittmann <i>et al.</i> , 1981)  |
| Skeletal muscle (total) | Surgical patients ( gynecological and other cases)                                                                           | Skeletal muscle                                       | N.R.                | (34-75)                                | N.R.                                                    | (Loebis, 1986)                   |
| <b>Meropenem</b>        |                                                                                                                              |                                                       |                     |                                        |                                                         |                                  |
| Bone (total)            | Patients undergoing orthopedic surgery (total hip or knee replacement, other joint surgery, laminectomy or joint aspiration) | Bone                                                  | 56.3 (29-75)        | N.R.                                   | N.R.                                                    | (Sano <i>et al.</i> , 1993)      |
| Cardiac muscle (total)  | Patients undergoing cardiac valve surgery (aortic or mitral -stenosis, -incompetence or -valve incompetence)                 | Atrial cardiac muscle tissue                          | 65.3 (47-75)        | 69.2 (45.5-91)                         | N.R.                                                    | (Newsom <i>et al.</i> , 1995)    |
| Adipose (uISF)          | Non-obese control subjects                                                                                                   | Subcutaneous adipose tissue of both upper arms        | 50 (31-64)          | 65 (52-84)                             | CrCL: 76 (53.6-136) mL/min, sCr: 66.4 (51.8-127) µmol/L | (Busse <i>et al.</i> , 2021 b)   |
| Adipose (uISF)          | Non-obese patients undergoing elective abdominal surgery (mainly tumor resection)                                            | Subcutaneous adipose tissue of both upper arms        | 49.5 ± 10           | 67.9 ± 8.8                             | sCr: 75.3 ± 18.8 µmol/L                                 | (Simon <i>et al.</i> , 2020)     |
| Skeletal muscle (uISF)  | Patients with sepsis undergoing decortication over al lateral thoracotomy for pneumonia                                      | Healthy pectoralis major muscle tissue                | 58.7 (30-70)        | 72.3 (68-87)                           | N.R.                                                    | (Tomaselli <i>et al.</i> , 2004) |

<sup>a</sup>: data presented as mean or median ± standard deviation (min-max)

Abbreviations: BMI: body mass index, CrCL: creatinine clearance, eGFR: estimated glomerular filtration rate, N.R.: Not reported, sCr: serum creatinine, uISF: unbound interstitial fluid concentration

**Table S5 Bioanalytical data of included studies**

| Drug-Matrix             | Analysis method | LLOQ tissue samples | External calibration                            | Sampling interval    | Reported time         | Data format         | Reference observed data           |
|-------------------------|-----------------|---------------------|-------------------------------------------------|----------------------|-----------------------|---------------------|-----------------------------------|
| <b>Piperacillin</b>     |                 |                     |                                                 |                      |                       |                     |                                   |
| Adipose (total)         | HPLC-UV         | 0.10 µg/mL          | No blood contamination correction               | Exact                | Exact                 | Figure              | (Kinzig <i>et al.</i> , 1992)     |
| Bone (total)            | HPLC-UV         | 0.157 µg/mL         | No blood contamination correction               | Exact                | Exact                 | Table               | (Incavo <i>et al.</i> , 1994)     |
| Skeletal muscle (total) | Microbiologic   | N.R.                | Blood contamination correction (3-5%)           | Exact                | Exact                 | Table               | (Russo <i>et al.</i> , 1982)      |
| Adipose (uISF)          | HPLC-UV         | 0.03 mg/mL          | Retrodialysis calibration                       | 30 or 60 minutes     | Midpoint              | Figure              | (Busse <i>et al.</i> , 2021 a)    |
| Adipose (uISF)          | HPLC-UV         | 2 µg/mL             | Retrodialysis calibration                       | 20 minutes           | Endpoint <sup>a</sup> | Figure              | (Brunner <i>et al.</i> , 2000)    |
| Skeletal muscle (uISF)  | HPLC-UV         | 2 µg/mL             | Retrodialysis calibration                       | 20 minutes           | Endpoint <sup>a</sup> | Figure              | (Joukhadar <i>et al.</i> , 2001)  |
| <b>Cefazolin</b>        |                 |                     |                                                 |                      |                       |                     |                                   |
| Adipose (total)         | Microbiologic   | 0.063 µg/mL         | N.R.                                            | Exact                | Exact                 | Figure              | (Ohge <i>et al.</i> , 1999)       |
| Bone (total)            | HPLC-UV         | N.R.                | N.R.                                            | Exact                | Exact                 | Figure              | (Yamada <i>et al.</i> , 2011)     |
| Skeletal muscle (total) | Microbiologic   | N.R.                | Blood contamination correction (6.3%)           | Exact                | Exact                 | Figure              | (Sinagowitz <i>et al.</i> , 1976) |
| Adipose (uISF)          | HPLC-UV         | 1.0 µg/mL           | Retrodialysis calibration                       | 20 minutes           | Midpoint <sup>a</sup> | Figure              | (Brill <i>et al.</i> , 2014)      |
| Adipose (uISF)          | HPLC-MS/MS      | N.R.                | Retrodialysis calibration                       | 20 or 30 minutes     | Endpoint <sup>a</sup> | Figure              | (Roberts <i>et al.</i> , 2015)    |
| Adipose (uISF)          | HPLC-MS/MS      | N.R.                | Retrodialysis calibration                       | 30 minutes           | Endpoint <sup>a</sup> | Figure              | (Douglas <i>et al.</i> , 2011)    |
| <b>Cefuroxime</b>       |                 |                     |                                                 |                      |                       |                     |                                   |
| Adipose (total)         | HPLC-UV         | 1.0 µg/g            | No blood contamination correction               | Exact                | Exact                 | Figure              | (Huizinga <i>et al.</i> , 1989)   |
| Bone (total)            | HPLC-UV         | 0.1µg/mL            | N.R.                                            | Exact                | Exact                 | Figure <sup>b</sup> | (Gergs <i>et al.</i> , 2020)      |
| Skeletal muscle (total) | HPLC-UV         | 1.25 µg/mL          | Blood contamination correction (<30%)           | Exact                | Exact                 | Table               | (Kaukonen <i>et al.</i> , 1995)   |
| Adipose (uISF)          | HPLC-UV         | 0.06 µg/mL          | Retrodialysis calibration                       | 15, 30 or 60 minutes | Midpoint              | Figure              | (Hanberg <i>et al.</i> , 2021)    |
| Bone (uISF)             | HPLC            | 0.06 µg/mL          | Retrodialysis calibration                       | 30 minutes           | Midpoint              | Figure              | (Tøttrup <i>et al.</i> , 2019)    |
| Skeletal muscle (uISF)  | HPLC-UV         | 0.3 µg/mL           | Retrodialysis calibration                       | 30 or 60 minutes     | Endpoint              | Figure              | (Schwameis <i>et al.</i> , 2017)  |
| <b>Ceftazidime</b>      |                 |                     |                                                 |                      |                       |                     |                                   |
| Adipose (total)         | Microbiologic   | N.R.                | Blood contamination correction                  | Exact                | Exact                 | Figure              | (Loebis, 1986)                    |
| Bone (total)            | Microbiologic   | 0.08 µg/mL          | "Samples contaminated with blood were excluded" | Exact                | Exact                 | Table <sup>c</sup>  | (Wittmann <i>et al.</i> , 1981)   |
| Skeletal muscle (total) | Microbiologic   | N.R.                | Blood contamination correction                  | Exact                | Exact                 | Figure              | (Loebis, 1986)                    |
| <b>Meropenem</b>        |                 |                     |                                                 |                      |                       |                     |                                   |
| Bone (total)            | Microbiologic   | N.R.                | N.R.                                            | Exact                | Exact                 | Table               | (Sano <i>et al.</i> , 1993)       |
| Cardiac muscle (total)  | HPLC-UV         | 0.01 µg/mL          | No blood contamination correction               | Exact                | Exact                 | Figure              | (Newsom <i>et al.</i> , 1995)     |
| Adipose (uISF)          | HPLC-UV         | 0.02 µg/mL          | Retrodialysis calibration                       | 30 or 60 minutes     | Midpoint              | Figure              | (Busse <i>et al.</i> , 2021 b)    |
| Adipose (uISF)          | HPLC-UV         | 0.02 µg/mL          | Retrodialysis calibration                       | 30 or 60 minutes     | Midpoint              | Figure              | (Simon <i>et al.</i> , 2020)      |
| Skeletal muscle (uISF)  | HPLC            | N.R.                | Retrodialysis calibration                       | 20 minutes           | Midpoint              | Figure              | (Tomaselli <i>et al.</i> , 2004)  |

Abbreviations: HPLC: high pressure liquid chromatography, LLOQ: lower limit of quantification, MS/MS tandem mass spectrometry, , N.R.: not reported, uISF: unbound interstitial fluid concentration, UV: ultraviolet spectrometry

<sup>a</sup>: not explicitly mentioned but assumed based on reported methodology and results

<sup>b</sup>: plasma samples digitized up to 330 minutes (after that, limited contrast with zero on graph)

<sup>c</sup>: plasma samples after 8 and 12h excluded

**Table S6 Area under the curve (AUC) assessment for PBPK model verification**

| Drug - Matrix       | AUC interval | AUC <sub>Plasma,u</sub> |                       |      | AUC <sub>Tissue</sub> |                       |      | AUC <sub>Tissue/Plasma,u</sub> |           |      | Reference observed data          |
|---------------------|--------------|-------------------------|-----------------------|------|-----------------------|-----------------------|------|--------------------------------|-----------|------|----------------------------------|
|                     |              | Observed (mg.min/mL)    | Predicted (mg.min/mL) | FE   | Observed (mg.min/mL)  | Predicted (mg.min/mL) | FE   | Observed                       | Predicted | FE   |                                  |
| <b>Piperacillin</b> |              |                         |                       |      |                       |                       |      |                                |           |      |                                  |
| Adipose (total)     | 0-inf        | 289 <sup>a</sup>        | 254                   | 0.88 | N.R.                  | N.R.                  | N.R. | N.R.                           | N.R.      | N.R. | (Kinzig <i>et al.</i> , 1992)    |
| Adipose (uISF)      | 0-4h         | 70                      | 216                   | 3.10 | 29                    | 209                   | 7.32 | 0.43                           | 0.97      | 2.25 | (Brunner <i>et al.</i> , 2000)   |
| Muscle (uISF)       | 0-4h         | 506                     | 237                   | 0.47 | 264                   | 232                   | 0.88 | 0.55                           | 0.98      | 1.78 | (Joukhadar <i>et al.</i> , 2001) |
| <b>Cefazolin</b>    |              |                         |                       |      |                       |                       |      |                                |           |      |                                  |
| Adipose (uISF)      | 0-4h         | N.R.                    | 108                   | N.R. | N.R.                  | 106                   | N.R. | 1.02                           | 0.98      | 0.96 | (Brill <i>et al.</i> , 2014)     |
| Adipose (uISF)      | 0-6h         | 46                      | 52                    | 1.12 | 33                    | 52                    | 1.58 | 0.74                           | 1.00      | 1.35 | (Roberts <i>et al.</i> , 2015)   |
| Adipose (uISF)      | 0-8h         | 78                      | 132                   | 1.71 | 66                    | 132                   | 2.01 | 0.85                           | 1.00      | 1.17 | (Douglas <i>et al.</i> , 2011)   |
| <b>Cefuroxime</b>   |              |                         |                       |      |                       |                       |      |                                |           |      |                                  |
| Adipose (uISF)      | 0-6h         | 92 <sup>a</sup>         | 113                   | 1.23 | 142                   | 113                   | 0.80 | 1.64 <sup>a</sup>              | 1.00      | 0.61 | (Hanberg <i>et al.</i> , 2021)   |
| Bone (uISF)         | 0-inf        | 97                      | 110                   | 1.14 | 101                   | 110                   | 1.09 | 1.03                           | 1.00      | 0.97 | (Tøttrup <i>et al.</i> , 2019)   |
| Muscle (uISF)       | 0-8h         | 101                     | 99                    | 0.98 | 178                   | 99                    | 0.56 | 1.79                           | 1.00      | 0.56 | (Schwameis <i>et al.</i> , 2017) |
| <b>Meropenem</b>    |              |                         |                       |      |                       |                       |      |                                |           |      |                                  |
| Adipose (uISF)      | 0-8h         | N.R.                    | 87                    | N.R. | N.R.                  | 86                    | N.R. | 0.31 <sup>a</sup>              | 1.00      | 3.23 | (Busse <i>et al.</i> , 2021 b)   |
| Adipose (uISF)      | 0-inf        | 88 <sup>a</sup>         | 94                    | 1.07 | 45                    | 94                    | 2.12 | 0.49 <sup>a</sup>              | 1.00      | 2.04 | (Simon <i>et al.</i> , 2020)     |
| Muscle (uISF)       | 0-8h         | 93 <sup>a</sup>         | 101                   | 1.08 | 44                    | 101                   | 2.29 | 0.61 <sup>a</sup>              | 1.00      | 1.63 | (Tomaselli <i>et al.</i> , 2004) |

<sup>a</sup>: observed unbound AUC in plasma obtained by multiplying reported total AUC in plasma value by the free fraction used in the PBPK simulation

Abbreviations: AUC<sub>Plasma,u</sub>: area under the curve unbound plasma, AUC<sub>Tissue</sub>: area under the curve tissue (total or unbound interstitial fluid concentration), AUC<sub>Tissue/Plasma,u</sub>: penetration ratio (ratio AUC<sub>Tissue</sub> to AUC<sub>Plasma,u</sub>), FE: fold error, N.R.: not reported, uISF: unbound interstitial fluid concentration.

**Table S7: Characteristics of the simulated populations**

| <b>Population</b>       | <b>Body weight<br/>(kg)</b> | <b>Body mass<br/>index<br/>(kg/m<sup>2</sup>)</b> | <b>GFR<br/>(mL/min/<br/>1.73m<sup>2</sup>)</b> | <b>Serum<br/>albumin<br/>(g/L)</b> | <b>Adipose<br/>blood flow<br/>(L/h)</b> | <b>Adipose<br/>volume (L)</b> | <b>Adipose<br/>perfusion<sup>a</sup><br/>(h<sup>-1</sup>)</b> |
|-------------------------|-----------------------------|---------------------------------------------------|------------------------------------------------|------------------------------------|-----------------------------------------|-------------------------------|---------------------------------------------------------------|
| Reference<br>population | 77.1<br>(52.9-105.2)        | 27.2<br>(19.6-35.6)                               | 110<br>(61-171)                                | 44.9<br>(38.0-53.0)                | 20.3<br>(13.7-28.4)                     | 26.7<br>(5.4-48.5)            | 1.06<br>(0.40-3.07)                                           |
| High cardiac<br>output  | 77.1<br>(52.9-105.2)        | 27.2<br>(19.6-35.6)                               | 110<br>(61-171)                                | 44.9<br>(38.0-53.0)                | 40.5<br>(27.4-56.7)                     | 26.7<br>(5.4-48.5)            | 2.13<br>(0.80-6.15)                                           |
| Low cardiac<br>output   | 77.1<br>(52.9-105.2)        | 27.2<br>(19.6-35.6)                               | 110<br>(61-171)                                | 44.9<br>(38.0-53.0)                | 10.1<br>(6.9-14.2)                      | 26.7<br>(5.4-48.5)            | 0.53<br>(0.20-1.54)                                           |
| Obese                   | 97.5<br>(78.5-118.3)        | 34.9<br>(31.7-38.4)                               | 159<br>(84-247)                                | 43.9<br>(36.5-52.0)                | 39.5<br>(27.9-54.0)                     | 43.1<br>(25.4-58.6)           | 0.98<br>(0.60-1.51)                                           |
| Morbidly<br>obese       | 123.2<br>(100.2-155.5)      | 44.6<br>(40.8-49.0)                               | 209<br>(116-316)                               | 43.1<br>(35.9-51.2)                | 54.7<br>(43.9-67.3)                     | 63.1<br>(43.3-83.8)           | 0.90<br>(0.63-1.24)                                           |

*Data presented as mean and 90 percentiles (5-95%) of simulated population,*

*<sup>a</sup> : adipose perfusion calculated as adipose blood flow/adipose volume,*

*Abbreviations: GFR: glomerular filtration rate.*

**Table S8 Selection of EUCAST minimal inhibitory concentrations (MIC) (mg/L)**

|                                          | Piperacillin | Cefazolin | Cefuroxime | Ceftazidime | Meropenem |
|------------------------------------------|--------------|-----------|------------|-------------|-----------|
| Non-species related (PK-PD)              | 16           | 2         | 8          | 8           | 8         |
| <i>Enterobacteriaceae</i>                | 8            | 4         | 8          | 4           | 8         |
| <i>Escherichia coli</i>                  | 8*           | 4*        | 8*         | 1*          | 0.06*     |
| <i>Pseudomonas aeruginosa</i>            | 16           | -         | -          | 8*          | 2*        |
| <i>Staphylococcus aureus</i>             | 4*           | 2*        | 4*         | 32*         | 0.5*      |
| <i>Streptococcus</i> groups A,B, C and G | 0.25         | 0.25      | 0.25       | 0.25        | 0.25      |
| <i>Streptococcus pneumoniae</i>          | 1            | -         | -          | 1           | 2         |

MIC breakpoints (Resistant, R>) taken from The European Committee on Antimicrobial Susceptibility Testing (EUCAST). Breakpoint tables for interpretation of MICs and zone diameters. Version 12.0, 2022. <http://www.eucast.org>

\*: Epidemiological cut-off values (ECOFF), data from EUCAST MIC distribution website, last accessed 14/Dec/2022. <http://www.eucast.org>.

PK-PD: pharmacokinetic-pharmacodynamic

## Supplementary references

- Abduljalil K, Ning J, Pansari A, Pan X, and Jamei M (2022) Prediction of Maternal and Fetoplacental Concentrations of Cefazolin, Cefuroxime, and Amoxicillin during Pregnancy Using Bottom-Up Physiologically Based Pharmacokinetic Models. *Drug Metab Dispos* **50**:386–400, American Society for Pharmacology and Experimental Therapeutics.
- Adam D, Reichart B, and Williams KJ (1983) Penetration of ceftazidime into human tissue in patients undergoing cardiac surgery. *J Antimicrob Chemother* **12 Suppl A**:269–273.
- Adam D, Schalkhäuser K, and Boettger F (1979) [Diffusion of cefuroxime into the prostatic and other tissues of the urogenital region (author's transl)]. *Med Klin* **74**:1867–1870.
- Alfter G, Schwenzer N, Friess D, and Möhrle E (1995) Perioperative antibiotic prophylaxis with cefuroxime in oral-maxillofacial surgical procedures. *Journal of Cranio-Maxillofacial Surgery* **23**:38–41.
- Al-Nawas B, Kinzig-Schippers M, Soergel F, and Shah PM (2008) Concentrations of piperacillin–tazobactam in human jaw and hip bone. *Journal of Cranio-Maxillofacial Surgery* **36**:468–472.
- Alvarez Ferrero MM, Vree TB, Van Ewijk-Beneken Kolmer EW, and Slooff TJ (1994) Relationship between plasma and bone concentrations of cefuroxime and flucloxacillin. Three different parenteral administrations compared in 30 arthroplasties. *Biopharm Drug Dispos* **15**:599–608.
- Andreas M, Zeitlinger M, Hoferl M, Jaeger W, Zimpfer D, Hiesmayr J-M, Laufer G, and Hutschala D (2013) Internal Mammary Artery Harvesting Influences Antibiotic Penetration Into Presternal Tissue. *The Annals of Thoracic Surgery* **95**:1323–1330.
- Andreas M, Zeitlinger M, Wissner W, Jaeger W, Maier-Salamon A, Thalhammer F, Kocher A, Hiesmayr J-M, Laufer G, and Hutschala D (2015) Cefazolin and linezolid penetration into sternal cancellous bone during coronary artery bypass grafting. *European Journal of Cardio-Thoracic Surgery* **48**:758–764.
- Barbour A, Schmidt S, Rout WR, Ben-David K, Burkhardt O, and Derendorf H (2009) Soft tissue penetration of cefuroxime determined by clinical microdialysis in morbidly obese patients undergoing abdominal surgery. *Int J Antimicrob Agents* **34**:231–235.
- Batra VK, Morrison JA, Lasseter KC, and Joy VA (1979) Piperacillin kinetics. *Clinical Pharmacology & Therapeutics* **26**:41–53.
- Berezhkovskiy LM (2004) Volume of distribution at steady state for a linear pharmacokinetic system with peripheral elimination. *Journal of Pharmaceutical Sciences* **93**:1628–1640.
- Bhalodi AA, Housman ST, Shepard A, Nugent J, and Nicolau DP (2013) Tissue Pharmacokinetics of Cefazolin in Patients with Lower Limb Infections. *Antimicrobial Agents and Chemotherapy*, American Society for Microbiology.
- Brill MJE, Houwink API, Schmidt S, Van Dongen EPA, Hazebroek EJ, van Ramshorst B, Deneer VH, Mouton JW, and Knibbe CAJ (2014) Reduced subcutaneous tissue distribution of cefazolin in

- morbidly obese versus non-obese patients determined using clinical microdialysis. *Journal of Antimicrobial Chemotherapy* **69**:715–723.
- Brunner M, Pernerstorfer T, Mayer BX, Eichler HG, and Müller M (2000) Surgery and intensive care procedures affect the target site distribution of piperacillin. *Critical Care Medicine* **28**:1754–1759.
- Bulitta JB, Kinzig M, Jakob V, Holzgrabe U, Sörgel F, and Holford NHG (2010) Nonlinear pharmacokinetics of piperacillin in healthy volunteers – implications for optimal dosage regimens. *Br J Clin Pharmacol* **70**:682–693.
- Busse D, Simon P, Petroff D, Dorn C, Schmitt L, Bindellini D, Kratzer A, Dietrich A, Zeitlinger M, Huisinga W, Michelet R, Wrigge H, and Kloft C (2021) Similar Piperacillin/Tazobactam Target Attainment in Obese versus Nonobese Patients despite Differences in Interstitial Tissue Fluid Pharmacokinetics. *Pharmaceutics* **13**:1380, Multidisciplinary Digital Publishing Institute.
- Busse D, Simon P, Schmitt L, Petroff D, Dorn C, Dietrich A, Zeitlinger M, Huisinga W, Michelet R, Wrigge H, and Kloft C (2021) Comparative Plasma and Interstitial Tissue Fluid Pharmacokinetics of Meropenem Demonstrate the Need for Increasing Dose and Infusion Duration in Obese and Non-obese Patients. *Clin Pharmacokinet*, doi: 10.1007/s40262-021-01070-6.
- Condon RE, Walker AP, Hanna CB, Greenberg RN, Broom A, and Pitkin D (1997) Penetration of meropenem in plasma and abdominal tissues from patients undergoing intraabdominal surgery. *Clin Infect Dis* **24 Suppl 2**:S181-183.
- Connors JE, DiPiro JT, Hayter RG, Hooker KD, Stanfield JA, and Young TR (1990) Assessment of cefazolin and cefuroxime tissue penetration by using a continuous intravenous infusion. *Antimicrobial Agents and Chemotherapy* **34**:1128–1131, American Society for Microbiology.
- Cunha BA, Gossling HR, Pasternak HS, Nightingale CH, and Quintiliani R (1977) The penetration characteristics of cefazolin, cephalothin, and cephradine into bone in patients undergoing total hip replacement. *JBJS* **59**:856–859.
- Daschner FD, Just M, Spillner G, and Schlosser V (1982) Penetration of piperacillin into cardiac valves, subcutaneous and muscle tissue of patients undergoing open-heart surgery. *Journal of Antimicrobial Chemotherapy* **9**:489–492.
- Daschner FD, Silbermann M, Kluge D, Reibetanz I, and Niederdellmann H (1981) Letter to the Editor. *Infection* **9**:302–302.
- Davies AJ, Lockley RM, Jones A, El-Safty M, and Clothier JC (1986) Comparative pharmacokinetics of cefamandole, cefuroxime and cephradine during total hip replacement. *Journal of Antimicrobial Chemotherapy* **17**:637–640.
- Deacon JS, Wertheimer SJ, and Washington JA (1996) Antibiotic prophylaxis and tourniquet application in podiatric surgery. *The Journal of Foot and Ankle Surgery* **35**:344–349.
- Douglas A, Udy AA, Wallis SC, Jarrett P, Stuart J, Lassig-Smith M, Deans R, Roberts MS, Taraporewalla K, Jenkins J, Medley G, Lipman J, and Roberts JA (2011) Plasma and Tissue Pharmacokinetics of Cefazolin in Patients Undergoing Elective and Semielective Abdominal Aortic Aneurysm Open Repair Surgery. *Antimicrobial Agents and Chemotherapy*, American Society for Microbiology.



- Dounis E, Tsourvakas S, Kalivas L, and Giamaçellou H (1995) Effect of time interval on tissue concentrations of cephalosporins after tourniquet inflation. Highest levels achieved by administration 20 minutes before inflation. *Acta Orthop Scand* **66**:158–160.
- Dudley MN, Nightingale CH, Drezner AD, Low HB, and Quintiliani R (1984) Comparative penetration of cefonicid and cefazolin into the atrial appendage and pericardial fluid of patients undergoing open-heart surgery. *Antimicrob Agents Chemother* **26**:347–350.
- Frank U, Kappstein I, Schmidt-Eisenlohr E, Schlosser V, Spillner G, Schindler M, and Daschner FD (1987) Penetration of ceftazidime into heart valves and subcutaneous and muscle tissue of patients undergoing open-heart surgery. *Antimicrob Agents Chemother* **31**:813–814.
- Friedman RJ, Friedrich LV, White RL, Kays MB, Brundage DM, and Graham J (1990) Antibiotic prophylaxis and tourniquet inflation in total knee arthroplasty. *Clin Orthop Relat Res* **17**–23.
- Garazzino S, Aprato A, Baietto L, D'Avolio A, Maiello A, De Rosa FG, Aloj D, Siccardi M, Biasibetti A, Massè A, and Di Perri G (2011) Ceftriaxone bone penetration in patients with septic non-union of the tibia. *Int J Infect Dis* **15**:e415-421.
- Gergs U, Becker L, Okoniewski R, Weiss M, Delank K-S, and Neumann J (2020) Population pharmacokinetics of cefuroxime and uptake into hip and spine bone of patients undergoing orthopaedic surgery. *J Pharm Pharmacol* **72**:364–370.
- Gergs U, Clauss T, Ihlefeld D, Weiss M, Pönicke K, Hofmann GO, and Neumann J (2014) Pharmacokinetics of ceftriaxone in plasma and bone of patients undergoing hip or knee surgery. *J Pharm Pharmacol* **66**:1552–1558.
- Hanberg P, Bue M, Kabel J, Jørgensen AR, Jessen C, Søballe K, and Stilling M (2021) Effects of tourniquet inflation on peri- and postoperative cefuroxime concentrations in bone and tissue. *Acta Orthop* **92**:746–752.
- Hanberg P, Bue M, Öbrink-Hansen K, Thomassen M, Søballe K, and Stilling M (2020) Timing of Antimicrobial Prophylaxis and Tourniquet Inflation: A Randomized Controlled Microdialysis Study. *JBJS* **102**:1857–1864.
- Hanberg P, Öbrink-Hansen K, Thorsted A, Bue M, Tøttrup M, Friberg LE, Hardlei TF, Søballe K, and Gjedsted J (2018) Population Pharmacokinetics of Meropenem in Plasma and Subcutis from Patients on Extracorporeal Membrane Oxygenation Treatment. *Antimicrobial Agents and Chemotherapy* **62**:e02390-17, American Society for Microbiology.
- Himebauch AS, Sankar WN, Flynn JM, Sisko MT, Moorthy GS, Gerber JS, Zuppa AF, Fox E, Dormans JP, and Kilbaugh TJ (2016) Skeletal muscle and plasma concentrations of cefazolin during complex paediatric spinal surgery†. *British Journal of Anaesthesia* **117**:87–94, Elsevier.
- Hsu V, de L. T. Vieira M, Zhao P, Zhang L, Zheng JH, Nordmark A, Berglund EG, Giacomini KM, and Huang S-M (2014) Towards Quantitation of the Effects of Renal Impairment and Probenecid Inhibition on Kidney Uptake and Efflux Transporters, Using Physiologically Based Pharmacokinetic Modelling and Simulations. *Clin Pharmacokinet* **53**:283–293.
- Hughes SP, Want S, Darrell JH, Dash CH, and Kennedy M (1982) Prophylactic cefuroxime in total joint replacement. *Int Orthop* **6**:155–161.

- Huizinga WKJ, Hirshberg A, Thomson SR, Elson KI, Salisbury RT, and Brock-Utne JG (1989) Prophylactic parenteral cefuroxime: Subcutaneous concentrations in laparotomy wounds. *Journal of Hospital Infection* **13**:395–398.
- Hutschala D, Skhirtladze K, Kinstner C, Mayer-Helm B, Müller M, Wolner E, and Tschernko EM (2007) In Vivo Microdialysis to Measure Antibiotic Penetration Into Soft Tissue During Cardiac Surgery. *The Annals of Thoracic Surgery* **84**:1605–1610, Elsevier.
- Incavo SJ, Ronchetti PJ, Choi JH, Wu H, Kinzig M, and Sörgel F (1994) Penetration of piperacillin-tazobactam into cancellous and cortical bone tissues. *Antimicrobial Agents and Chemotherapy* **38**:905–907, American Society for Microbiology.
- Johnson D (1987) Antibiotic prophylaxis with cefuroxime in arthroplasty of the knee. *The Journal of Bone and Joint Surgery British volume* **69-B**:787–789, The British Editorial Society of Bone & Joint Surgery.
- Joukhadar C, Frossard M, Mayer BX, Brunner M, Klein N, Siostrzonek P, Eichler HG, and Müller M (2001) Impaired target site penetration of  $\beta$ -lactams may account for therapeutic failure in patients with septic shock. *Critical Care Medicine* **29**:385–391.
- Kato M, and Morimoto R (1984) [Concentration of piperacillin in bone]. *Jpn J Antibiot* **37**:279–284.
- Katzer A, Wening JV, Kupka P, Meenen NM, and Jungbluth KH (1997) [Perioperative antibiotic prophylaxis in hip operations. Penetration into bone, capsule tissue and cartilage exemplified by cefuroxime]. *Unfallchirurgie* **23**:161–170.
- Kaukonen J-P, Tuomainen P, Mäkijärvi J, Mokka R, and ännistö PTM (1995) Intravenous cefuroxime prophylaxis Tissue levels after one 3-gram dose in 40 cases of hip fracture. *Acta Orthopaedica Scandinavica* **66**:14–16, Taylor & Francis.
- Kim M-K, Xuan D, Quintiliani R, Nightingale CH, and Nicolau DP (2001) Pharmacokinetic and pharmacodynamic profile of high dose extended interval piperacillin–tazobactam. *Journal of Antimicrobial Chemotherapy* **48**:259–267.
- Kinzig M, Sörgel F, Brismar B, and Nord CE (1992) Pharmacokinetics and tissue penetration of tazobactam and piperacillin in patients undergoing colorectal surgery. *Antimicrob Agents Chemother* **36**:1997–2004.
- Kram JJF, Greer DM, Cabrera O, Burlage R, Forgie MM, and Siddiqui DS (2017) Does current cefazolin dosing achieve adequate tissue and blood concentrations in obese women undergoing cesarean section? *European Journal of Obstetrics and Gynecology and Reproductive Biology* **210**:334–341, Elsevier.
- Landersdorfer CB, Bulitta JB, Kirkpatrick CMJ, Kinzig M, Holzgrabe U, Drusano GL, Stephan U, and Sörgel F (2012) Population Pharmacokinetics of Piperacillin at Two Dose Levels: Influence of Nonlinear Pharmacokinetics on the Pharmacodynamic Profile. *Antimicrob Agents Chemother* **56**:5715–5723.
- Leigh DA, Griggs J, Tighe CM, Powell HD, Church JC, Wise K, Channon G, and Curtis LB (1985) Pharmacokinetic study of ceftazidime in bone and serum of patients undergoing hip and knee arthroplasty. *J Antimicrob Chemother* **16**:637–642.

- Leigh DA, Marriner J, Nisbet D, Powell HDW, Church JCT, and Wise K (1982) Bone concentrations of cefuroxime and cefamandole in the femoral head in 96 patients undergoing total hip replacement surgery. *Journal of Antimicrobial Chemotherapy* **9**:303–311.
- Loebis LH (1986) Tissue levels in patients after intravenous administration of ceftazidime. *Journal of Antimicrobial Chemotherapy* **16**:757–761.
- Lovering AM, Perez J, Bowker KE, Reeves DS, MacGowan AP, and Bannister G (1997) A comparison of the penetration of cefuroxime and cephmandole into bone, fat and haematoma fluid in patients undergoing total hip replacement. *Journal of Antimicrobial Chemotherapy* **40**:99–104.
- Lozano-Alonso S, Linares-Palomino JP, Vera-Arroyo B, Bravo-Molina A, Hernández-Quero J, and Ros-Díe E (2016) Evaluación de la capacidad de difusión tisular de antibióticos en isquemia de miembros inferiores. *Enfermedades Infecciosas y Microbiología Clínica* **34**:477–483.
- Maggio L, Nicolau DP, DaCosta M, Rouse DJ, and Hughes BL (2015) Cefazolin Prophylaxis in Obese Women Undergoing Cesarean Delivery: A Randomized Controlled Trial. *Obstetrics & Gynecology* **125**:1205–1210.
- Newsom SW, Palsingh J, Wells FC, and Kelly HC (1995) Penetration of meropenem into heart valve tissue. *J Antimicrob Chemother* **36 Suppl A**:57–62.
- Nolting A, Costa TD, Vistelle R, Rand KH, and Derendorf H (1996) Determination of Free Extracellular Concentrations of Piperacillin by Microdialysis. *Journal of Pharmaceutical Sciences* **85**:369–372.
- Nungu KS, Larsson S, Wallinder L, and Holm S (1995) Bone and wound fluid concentrations of cephalosporins Oral cefadroxil and parenteral cefuroxime compared in 52 patients with a trochanteric fracture. *Acta Orthopaedica Scandinavica* **66**:161–165, Taylor & Francis.
- Occhipinti DJ, Pendland SL, Schoonover LL, Rypins EB, Danziger LH, and Rodvold KA (1997) Pharmacokinetics and pharmacodynamics of two multiple-dose piperacillin-tazobactam regimens. *Antimicrobial Agents and Chemotherapy* **41**:2511–2517, American Society for Microbiology.
- Ohge H, Takesue Y, Yokoyama T, Murakami Y, Hiyama E, Yokoyama Y, Kanehiro T, Itaha H, and Matsuura Y (1999) An additional dose of cefazolin for intraoperative prophylaxis. *Surg Today* **29**:1233–1236.
- Palma EC, Laureano JV, de Araújo BV, Meinhardt NG, Stein AT, and Dalla Costa T (2018) Fast and sensitive HPLC/UV method for cefazolin quantification in plasma and subcutaneous tissue microdialysate of humans and rodents applied to pharmacokinetic studies in obese individuals. *Biomedical Chromatography* **32**:e4254.
- Papaioannou N, Kalivas L, Kalavritinos J, and Tsourvakas S (1994) Tissue concentrations of third-generation cephalosporins (ceftazidime and ceftriaxone) in lower extremity tissues using a tourniquet. *Arch Orthop Trauma Surg* **113**:167–169.
- Pojar M, Mandak J, Malakova J, and Jokesova I (2008) Tissue and plasma concentrations of antibiotic during cardiac surgery with cardiopulmonary bypass--microdialysis study. *Biomed Pap Med Fac Univ Palacky Olomouc Czech Repub* **152**:139–145.

- Polk R, Hume A, Kline BJ, and Cardea J (1983) Penetration of moxalactam and cefazolin into bone following simultaneous bolus or infusion. *Clin Orthop Relat Res* 216–221.
- Polk RE, Smith JE, Ducey K, and Lower RR (1982) Penetration of moxalactam and cefazolin into atrial appendage after simultaneous intramuscular or intravenous administration. *Antimicrobial Agents and Chemotherapy* 22:201–203, American Society for Microbiology.
- Poulin P, and Theil F-P (2002) Prediction of pharmacokinetics prior to in vivo studies. 1. Mechanism-based prediction of volume of distribution. *Journal of Pharmaceutical Sciences* 91:129–156.
- Raymakers JT, Schaper NC, van der Heyden JJ, Tordoir JH, and Kitslaar PJ (1998) Penetration of ceftazidime into bone from severely ischaemic limbs. *J Antimicrob Chemother* 42:543–545.
- Roberts JA, Kirkpatrick CMJ, Roberts MS, Robertson TA, Dalley AJ, and Lipman J (2009) Meropenem dosing in critically ill patients with sepsis and without renal dysfunction: intermittent bolus versus continuous administration? Monte Carlo dosing simulations and subcutaneous tissue distribution. *J Antimicrob Chemother* 64:142–150.
- Roberts JA, Udy AA, Jarrett P, Wallis SC, Hope WW, Sharma R, Kirkpatrick CMJ, Kruger PS, Roberts MS, and Lipman J (2015) Plasma and target-site subcutaneous tissue population pharmacokinetics and dosing simulations of cefazolin in post-trauma critically ill patients. *Journal of Antimicrobial Chemotherapy* 70:1495–1502.
- Rodgers T, and Rowland M (2007) Mechanistic Approaches to Volume of Distribution Predictions: Understanding the Processes. *Pharm Res* 24:918–933.
- Rout PG, and Frame JW (1992) Concentration of cefuroxime in mandibular alveolar bone following a single preoperative dose. *Br J Oral Maxillofac Surg* 30:252–253.
- Russo J, Thompson MI, Russo ME, Saxon BA, Matsen JM, Moody FG, and Rikkers LF (1982) Piperacillin distribution into bile, gallbladder wall, abdominal skeletal muscle, and adipose tissue in surgical patients. *Antimicrobial Agents and Chemotherapy* 22:488–492, American Society for Microbiology.
- Sano T, Sakurai M, Dohi S, Oyama A, Murota K, Sugiyama H, Miura Y, Kusuoka K, and Kurata K (1993) [Investigation of meropenem levels in the human bone marrow blood, bone, joint fluid and joint tissues]. *Jpn J Antibiot* 46:159–163.
- Schmitt W (2008) General approach for the calculation of tissue to plasma partition coefficients. *Toxicology in Vitro* 22:457–467.
- Schwameis R, Syré S, Marhofer D, Appelt A, Burau D, Sarahrudi K, Kloft C, and Zeitlinger M (2017) Pharmacokinetics of Cefuroxime in Synovial Fluid. *Antimicrobial Agents and Chemotherapy* 61:e00992-17, American Society for Microbiology.
- Simon P, Petroff D, Busse D, Heyne J, Girrbach F, Dietrich A, Kratzer A, Zeitlinger M, Kloft C, Kees F, Wrigge H, and Dorn C (2020) Meropenem Plasma and Interstitial Soft Tissue Concentrations in Obese and Nonobese Patients-A Controlled Clinical Trial. *Antibiotics (Basel)* 9:E931.
- Sinagowitz E, Burgert A, Kaczowski W, and Pelz K (1976) Concentrations of cefazolin in human skeletal muscle. *Infection* 4:192–195.

- Skhirtladze-Dworschak K, Hutschala D, Reining G, Dittrich P, Bartunek A, Dworschak M, and Tschernko EM (2019) Cefuroxime plasma and tissue concentrations in patients undergoing elective cardiac surgery: Continuous vs bolus application. A pilot study. *Br J Clin Pharmacol* **85**:818–826.
- Tchaick RM, Sá MPBO, Figueira FR de M, Paz KC, Ferraz ÁAB, and Moraes FR de (2017) Cefazolin Concentration in the Mediastinal Adipose Tissue of Patients Undergoing Cardiac Surgery. *Braz J Cardiovasc Surg*, doi: 10.21470/1678-9741-2016-0031.
- Tetzlaff TR, Howard JB, McCracken GH, Calderon E, and Larrondo J (1978) Antibiotic concentrations in pus and bone of children with osteomyelitis. *The Journal of Pediatrics* **92**:135–140, Elsevier.
- Tjandramaga TB, Mullie A, Verbesselt R, De Schepper PJ, and Verbist L (1978) Piperacillin: Human Pharmacokinetics After Intravenous and Intramuscular Administration. *Antimicrobial Agents and Chemotherapy* **14**:829–837, American Society for Microbiology.
- Tomaselli F, Maier A, Matzi V, Smolle-Jüttner FM, and Dittrich P (2004) Penetration of Meropenem into Pneumonic Human Lung Tissue as Measured by In Vivo Microdialysis. *Antimicrobial Agents and Chemotherapy* **48**:2228–2232, American Society for Microbiology.
- Tøttrup M, Søballe K, Bibby BM, Hardlei TF, Hansen P, Fursted K, Birke-Sørensen H, and Bue M (2019) Bone, subcutaneous tissue and plasma pharmacokinetics of cefuroxime in total knee replacement patients - a randomized controlled trial comparing continuous and short-term infusion. *APMIS* **127**:779–788.
- Tůma P, Jaček M, Sommerová B, Dlouhý P, Jarošíková R, Husáková J, Wosková V, and Fejfarová V (2022) Monitoring of amoxicilline and ceftazidime in the microdialysate of diabetic foot and serum by capillary electrophoresis with contactless conductivity detection. *Electrophoresis*, doi: 10.1002/elps.202100366.
- Utsey K, Gastonguay MS, Russell S, Freling R, Riggs MM, and Elmokadem A (2020) Quantification of the Impact of Partition Coefficient Prediction Methods on Physiologically Based Pharmacokinetic Model Output Using a Standardized Tissue Composition. *Drug Metab Dispos* **48**:903–916, American Society for Pharmacology and Experimental Therapeutics.
- van Lindert ACM, Giltaij AR, Derksen MD, Alsbach GPJ, Rozenberg-Arska M, and Verhoef J (1990) Single-dose prophylaxis with broad-spectrum penicillins (piperacillin and mezlocillin) in gynecologic oncological surgery, with observation on serum and tissue concentrations. *European Journal of Obstetrics & Gynecology and Reproductive Biology* **36**:137–145.
- Varghese JM, Jarrett P, Wallis SC, Boots RJ, Kirkpatrick CMJ, Lipman J, and Roberts JA (2015) Are interstitial fluid concentrations of meropenem equivalent to plasma concentrations in critically ill patients receiving continuous renal replacement therapy? *Journal of Antimicrobial Chemotherapy* **70**:528–533.
- Vuorisalo null, Pokela null, Satta null, and Syrjälä null (2000) Internal Mammary Artery Harvesting and Antibiotic Concentrations in Sternal Bone During Coronary Artery Bypass. *Int J Angiol* **9**:78–81.
- Williams DN, Gustilo RB, Beverly R, and Kind AC (1983) Bone and serum concentrations of five cephalosporin drugs. Relevance to prophylaxis and treatment in orthopedic surgery. *Clin Orthop Relat Res* 253–265.

- Wittau M, Scheele J, Kurlbaum M, Brockschmidt C, Wolf AM, Hemper E, Henne-Bruns D, and Bulitta JB (2015) Population Pharmacokinetics and Target Attainment of Meropenem in Plasma and Tissue of Morbidly Obese Patients after Laparoscopic Intraperitoneal Surgery. *Antimicrob Agents Chemother* **59**:6241–6247.
- Wittmann DH, Schassan HH, Kohler F, and Seibert W (1981) Pharmacokinetic studies of ceftazidime in serum, bone, bile, tissue fluid and peritoneal fluid. *J Antimicrob Chemother* **8 Suppl B**:293–297.
- Yamada K, Matsumoto K, Tokimura F, Okazaki H, and Tanaka S (2011) Are Bone and Serum Cefazolin Concentrations Adequate for Antimicrobial Prophylaxis? *Clinical Orthopaedics and Related Research*® **469**:3486–3494.
- Young OM, Shaik IH, Twedt R, Binstock A, Althouse AD, Venkataramanan R, Simhan HN, Wiesenfeld HC, and Caritis SN (2015) Pharmacokinetics of cefazolin prophylaxis in obese gravidae at time of cesarean delivery. *American Journal of Obstetrics & Gynecology* **213**:541.e1-541.e7, Elsevier.
